# Supplementary material for: Experiences among firefighters and police officers of responding to out-of-hospital cardiac arrest in a dual dispatch programme in Sweden: an interview study
Source: PubMed Central journal article supplement — BMJ Open. 2019 Nov 21;9(11):e030895. doi: 10.1136/bmjopen-2019-030895 (PMC6887046; doi:10.1136/bmjopen-2019-030895), 2019-11-21
Supplement: bmjopen-2019-030895.draft_revisions.pdf [file bmjopen-2019-030895.draft_revisions.pdf]

# BMJ Open

BMJ Open is committed to open peer review. As part of this commitment we make the peer review history of every article we publish publicly available.

When an article is published we post the peer reviewers' comments and the authors' responses online. We also post the versions of the paper that were used during peer review. These are the versions that the peer review comments apply to.

The versions of the paper that follow are the versions that were submitted during the peer review process. They are not the versions of record or the final published versions. They should not be cited or distributed as the published version of this manuscript.

BMJ Open is an open access journal and the full, final, typeset and author-corrected version of record of the manuscript is available on our site with no access controls, subscription charges or pay-per-view fees (<http://bmjopen.bmj.com>).

If you have any questions on BMJ Open's open peer review process please email [info.bmjopen@bmj.com](mailto:info.bmjopen@bmj.com)

# BMJ Open

## Experiences among firefighters and police officers of saving lives in out-of-hospital cardiac arrest in a dual dispatch programme

|                               |                                                                                                                                                                                                                                                                                                                                                                                                                                                                                 |
|-------------------------------|---------------------------------------------------------------------------------------------------------------------------------------------------------------------------------------------------------------------------------------------------------------------------------------------------------------------------------------------------------------------------------------------------------------------------------------------------------------------------------|
| Journal:                      | <i>BMJ Open</i>                                                                                                                                                                                                                                                                                                                                                                                                                                                                 |
| Manuscript ID                 | bmjopen-2019-030895                                                                                                                                                                                                                                                                                                                                                                                                                                                             |
| Article Type:                 | Research                                                                                                                                                                                                                                                                                                                                                                                                                                                                        |
| Date Submitted by the Author: | 17-Apr-2019                                                                                                                                                                                                                                                                                                                                                                                                                                                                     |
| Complete List of Authors:     | Hasselqvist-Ax, Ingela ; Karolinska institutet, Dept. of Cardiology, Centre for Resuscitation Science<br>Nordberg, Per; Karolinska institutet, Dept. of Cardiology, Centre for Resuscitation Science<br>Svensson, Leif; Karolinska Institute, Department of Medicine<br>Hollenberg, Jacob; Karolinska Institutet, Department of Medicine, Center for Resuscitation Science<br>Joelsson-Alm, Eva; Karolinska Institutet, Dept. of Clinical Science and Education, Södersjukhuset |
| Keywords:                     | Cardiopulmonary Resuscitation, Critical Incident Technique, Firefighters, First Responders, Out-of-Hospital Cardiac Arrest, Police Officers                                                                                                                                                                                                                                                                                                                                     |
|                               |                                                                                                                                                                                                                                                                                                                                                                                                                                                                                 |

SCHOLARONE™  
Manuscripts

## Experiences among firefighters and police officers of saving lives in out-of-hospital cardiac arrest in a dual dispatch programme

Ingela Hasselqvist-Ax,<sup>1</sup> Per Nordberg,<sup>2</sup> Leif Svensson,<sup>2</sup> Jacob Hollenberg,<sup>2</sup> Eva Joelsson-Alm<sup>3</sup>

<sup>1</sup>Ingela Hasselqvist-Ax, RN, PhD, Centre for Resuscitation Science, Department of Medicine, Solna, Karolinska Institutet, The Swedish Resuscitation Council, Box 5182, SE-12118 Johanneshov, Sweden. (ORCID 0000-0001-5081-6532)

<sup>2</sup>Per Nordberg, MD, PhD, Centre for Resuscitation Science, Department of Medicine, Solna, Karolinska Institutet and Section of Cardiology, South General Hospital, SE-118 83 Stockholm, Sweden

<sup>2</sup>Leif Svensson, MD, Professor, Centre for Resuscitation Science, Department of Medicine, Solna, Karolinska Institutet, South General Hospital, SE-118 83 Stockholm, Sweden

<sup>2</sup>Jacob Hollenberg, MD, Associate professor, Centre for Resuscitation Science, Department of Medicine, Solna, Karolinska Institutet, Section of Cardiology, South General Hospital, SE-118 83 Stockholm, Sweden

<sup>3</sup>Eva Joelsson-Alm, MSN, PhD, Department of Clinical Science and Education, Karolinska Institutet, Section of Anesthesiology and Intensive Care, South General Hospital, SE-118 83 Stockholm, Sweden.

Correspondence to

Ingela Hasselqvist-Ax

E-mail (1): [ingela.hasselqvist-ax@hlr.nu](mailto:ingela.hasselqvist-ax@hlr.nu)

E-mail (2): [ingela.hasselqvist-ax@ki.se](mailto:ingela.hasselqvist-ax@ki.se)

Abstract: 215 words

Article: 2964 words

## Abstract

**Objectives** The objective of this study was to explore firefighters' and police officers' experiences of saving lives in out-of-hospital cardiac arrest.

**Design** A qualitative interview study using Critical Incident Technique (CIT), and inductive content analysis.

**Setting** The County of Stockholm, Sweden.

**Participants** Police officers (n=10), and firefighters (n=12) participating in a dual dispatch programme with Emergency Medical Services in case of suspected out-of-hospital cardiac arrest.

**Results** Analysis of 60 critical incidents was performed resulting in three consecutive time sequences (Preparedness, Managing the scene, and The aftermath) with related categories, where first responders described the complexity of the cardiac arrest situation. Detailed information about the case and the location was crucial for the preparedness, and information deficits created stress, frustration and incorrect perceptions about the victim. The technical challenges of performing cardiopulmonary resuscitation and managing the airway, was prominent and the need of regular team training and education in first aid was highlighted.

**Conclusions** Participating in dual dispatch in case of suspected out-of-hospital cardiac arrest was described as a complex technical and emotional process by first responders. Providing case discussions and opportunities to give, and receive feedback about the case is a main task for the leadership in the organizations to diminish stress among personnel and to improve future OHCA missions.

## Article summary

- Few studies concerning first responders' experiences about participating in dual dispatch with Emergency Medical Services in out-of-hospital cardiac arrest have previously been published.
- To diminish stress reactions amongst first responders, case discussions after tough out-of-hospital cardiac arrest missions, should be provided within the participating organizations.
- Qualitative studies propose a deeper understanding of a phenomenon, but the results cannot be generalized to any other group of first responders or organizations. However new theories and fields of research can be developed from the results.

## Keywords

Cardiopulmonary Resuscitation; Critical Incident Technique; Firefighters; First responders; Out-of-Hospital Cardiac Arrest; Police officers

## 1 Introduction

2 To improve outcome in out-of-hospital cardiac arrest (OHCA) several prehospital measures  
3 have been introduced worldwide, e.g. different types of public access defibrillation programs<sup>1</sup>  
4 and implementation of dual dispatch systems including emergency medical services (EMS),  
5 firefighters and/or police officers i.e. first responders (FRs), trained in Basic Life Support  
6 (BLS) dispatched in case of suspected OHCA.<sup>2-5</sup> In the County of Stockholm, Sweden, a dual  
7 dispatch system involving EMS and firefighters was introduced in 2005.<sup>6</sup> Police officers were  
8 fully integrated in the OHCA alarm system in 2012.<sup>7</sup> Experiences of performing  
9 cardiopulmonary resuscitation (CPR) outside hospital are mostly explored within the  
10 bystander population.<sup>8-12</sup> Previous research in regards to FRs experiences of participating in  
11 emergency call-outs has been described in the context of traffic accidents<sup>13</sup> and  
12 psychological consequences about performing CPR and using an automated external  
13 defibrillator (AED).<sup>14</sup>

14 The aim of this interview study was to explore firefighters' and police officers' experiences of  
15 saving lives in OHCA in a dual dispatch programme.

## 16 Methods

### 17 Design

18 This was an interview study where data was analysed by using Critical Incident Technique  
19 (CIT)<sup>15</sup> and inductive qualitative content analysis.<sup>16</sup> A "critical incident" (CI), in this study is  
20 a description of a cardiac arrest situation recalled as important by the participants.

### 21 Study setting and dispatch

22 The study was conducted in Stockholm County covering 6.5 km<sup>2</sup> with 2.3 milj. inhabitants  
23 living in densely populated urban areas, as well as in more rural parts. In case of an suspected  
24 OHCA the dispatchers at the Emergency Medical Communication Centre (EMCC) dispatches

1 two ambulances staffed with specialist nurses and emergency medical technicians.<sup>17</sup> FRs  
2 trained in BLS, and equipped with AEDs are also simultaneously dispatched.<sup>18</sup>  
3 Approximately 1200 confirmed OHCA occurs annually, and FRs are being dispatched in  
4 estimated 70% of these cases.

### 5 **Participants**

6  
7 Eligible were firefighters and police officers with experiences of being dispatched as first  
8 responders in OHCA. The recommended sample size in CIT depends on what activity or  
9 behavior being studied. If the activity is relatively well-defined, a total number of 50 to 100  
10 critical incidents (CIs) are needed for the analysis.<sup>15 19</sup> With an estimate of 2-4 CIs per  
11 interview, a sample size of approximately 20 interviews was considered sufficient.

### 12 **Data collection**

13 The strategy used was a purposeful sampling of key participants with knowledge from one or  
14 more cardiac arrest situations, with the main focus to collect as rich descriptions as possible.<sup>20</sup>  
15 To obtain a variety of workplaces, different ages and gender three approaches for recruitment  
16 were used; 1) An invitation letter from the researchers was presented to the main  
17 collaboration group for OHCA alarms in Stockholm County. 2) On the police report for  
18 cardiac arrest alarms there was a request to contact the researchers for a voluntary interview.  
19 3) Fire stations were directly contacted for recruitment of respondents. All three approaches  
20 were used, and all voluntary participants who fulfilled the inclusion criteria were included.  
21 The final study sample consisted of 22 participants; 12 firefighters representing four different  
22 fire brigades, and 10 police officers from eight police stations throughout the County. The  
23 participants received written information about the study and contact information to the  
24 researchers before the interviews took place. An interview guide with open-ended semi-  
25 structured questions was used (Table 1).

1  
2  
3  
4  
5  
6  
7  
8  
9  
10  
11  
12  
13  
14  
15  
16  
17  
18  
19  
20  
21  
22  
23  
24  
25  
26  
27  
28  
29  
30  
31  
32  
33  
34  
35  
36  
37  
38  
39  
40  
41  
42  
43  
44  
45  
46  
47  
48  
49  
50  
51  
52  
53  
54  
55  
56  
57  
58  
59  
60

1 Table 1. Interview guide for collecting Critical Incidents

|                                                                                                                                                                                                                             |
|-----------------------------------------------------------------------------------------------------------------------------------------------------------------------------------------------------------------------------|
| 1. Can you describe a particular situation and the circumstances surrounding it when you have been dispatched to a person suffering from an out-of-hospital cardiac arrest? Please describe the circumstances and the time. |
| 2. Can you describe how you acted in this situation?                                                                                                                                                                        |
| 3. Can you describe how other persons acted in this situation?                                                                                                                                                              |
| 4. Can you describe how you reacted?                                                                                                                                                                                        |
| 5. What was the result of the situation?                                                                                                                                                                                    |
| 6. Do you want to add something more?                                                                                                                                                                                       |

2  
3 Data of demographic character was also collected. The participants could choose the place for  
4 the interview, and all except three took place at their regular workplaces. The interviews  
5 lasted between 9 to 38 minutes (22 minutes in median), and were all conducted by the first  
6 author (IHA). The interviews were recorded with a digital voice recorder (Olympus™ VN-  
7 7800PC), and transcribed verbatim by a secretary with knowledge of cardiac arrest research.  
8 A pilot interview to test the questions in the interview guide was performed in February 2015.  
9 No change of questions was needed. The pilot interview contained rich material with  
10 descriptions from three CIs, and were therefore included in the final analysis. The following  
11 interviews were carried out June 16<sup>th</sup> to December 13<sup>th</sup> 2016.

## 12 **Data analysis**

13  
14 The analysis was performed as follows: 1) Identification of CIs as the unit of analysis in each  
15 interview.[16] The CIs were thereafter read repeatedly to gain a comprehensive view of the  
16 whole. 2) Condensation of each CI into meaning units with the purpose to reduce the text and  
17 preserve the core in the narrative. A meaning unit is close to the text and is not interpreted by  
18 the researchers at this stage. 3) Interpretation and coding the meaning units into sub-



1 categories by the authors. 4) The sub-categories were thereafter merged into categories from  
 2 which time sequences were created (Table 2).

3 Table 2. Description of the analysis process

| Critical Incident (CI)                                                                                                                                                     | Condensed meaning units                                                                 | Sub-category | Category        | Time sequence      |
|----------------------------------------------------------------------------------------------------------------------------------------------------------------------------|-----------------------------------------------------------------------------------------|--------------|-----------------|--------------------|
| There was some sort of crack house; a younger girl had a cardiac arrest. // And then you think before going in, there is a second type of threat scenario when entering... | Crack house<br>Younger girl<br>Cardiac arrest<br>Think before going in<br>Second threat | Safety       | The environment | Managing the scene |

4 Excerpt from Critical Incident #1, (Firefighter #1)

5  
 6 To ensure rigor and consistency of interpretation, the analysis was discussed by the  
 7 researchers, and agreement was reached at every step to ensure that all analyses were  
 8 supported by the data.

### 9 **Ethical considerations**

10  
 11 Written informed consent was obtained from the participants and information was given about  
 12 the possibility to withdraw from the study without any reprisal. Participants were not entitled  
 13 to financial remuneration or other benefits. The study was approved by the Regional Ethics  
 14 Review Board in Stockholm, Sweden (registration number 2015/1091- 31/5).

### 15 **Patient and Public Involvement**

16 The patients and the public were not involved in planning or the design of this study.

## 18 **Results**

19  
 20 Baseline characteristics are presented in Table 3. Median age was 36 years and the working  
 21 experience as firefighter and police officer were 6.5 years in median for both professions.

1 Firefighters were predominantly men, and they had longer experience of being dispatched to  
 2 an OHCA than the participating police officers.

3 Table 3. Characteristics of respondents (n=22)

| (F/P) | Age (y) | Sex | Prof exp. (y) | No of CA | Years in OHCA dispatch | Latest CPR course (y) | CPR level | Chest compr. | Vent. | Defibr.* | Health-care edu.† |
|-------|---------|-----|---------------|----------|------------------------|-----------------------|-----------|--------------|-------|----------|-------------------|
| F1    | 23      | M   | 3.5           | 11-20    | 0-3                    | 1                     | PLS/ILS   | Yes          | Yes   | Yes      | Yes               |
| F2    | 47      | M   | 9.5           | >20      | 8-10                   | 1                     | PLS       | Yes          | Yes   | Yes      | Yes               |
| F3    | 26      | M   | 3.5           | 11-20    | 0-3                    | 1                     | PLS/ILS   | Yes          | Yes   | Yes      | No                |
| F4    | 43      | M   | 5             | >20      | 4-7                    | 1                     | PLS/ILS   | Yes          | Yes   | Yes      | Yes               |
| F5    | 50      | M   | 27            | >20      | 8-10                   | 1                     | BLS       | Yes          | Yes   | Yes      | No                |
| F6    | 54      | M   | 11            | >20      | 8-10                   | 1                     | BLS       | Yes          | Yes   | Yes      | Yes               |
| F7    | 43      | M   | 10            | >20      | 8-10                   | 1                     | BLS       | Yes          | Yes   | Yes      | No                |
| F8    | 28      | M   | 7             | 0-5      | 0-3                    | 1                     | ILS       | Yes          | Yes   | No       | Yes               |
| F9    | 35      | M   | 2             | 11-20    | 0-3                    | 1                     | ILS       | Yes          | Yes   | Yes      | No                |
| F10   | 36      | M   | 11            | >20      | 8-10                   | 1                     | PLS       | Yes          | Yes   | Yes      | No                |
| F11   | 27      | F   | 6             | >20      | 4-7                    | 1                     | ILS       | Yes          | Yes   | Yes      | No                |
| F12   | 28      | M   | 5             | 6-10     | 4-7                    | 1                     | ILS       | Yes          | Yes   | Yes      | Yes               |
| P1    | 40      | M   | 7             | >20      | 4-7                    | >2                    | ILS       | Yes          | No    | Yes      | No                |
| P2    | 31      | F   | 3             | 0-5      | 0-3                    | 1                     | ILS       | Yes          | No    | No       | Yes               |
| P3    | 30      | M   | 2             | 6-10     | 0-3                    | 1                     | BLS       | Yes          | Yes   | Yes      | No                |
| P4    | 43      | M   | 13            | >20      | 4-7                    | 1-2                   | ILS       | Yes          | No    | No       | Yes               |
| P5    | 26      | M   | 2             | 0-5      | 0-3                    | 1-2                   | BLS       | Yes          | No    | Yes      | Yes               |
| P6    | 38      | F   | 10            | 6-10     | 8-10                   | 1                     | ILS       | Yes          | Yes   | Yes      | No                |
| P7    | 28      | F   | 2.5           | 11-20    | 0-3                    | 1-2                   | ILS       | Yes          | No    | No       | No                |
| P8    | 33      | M   | 6             | 0-5      | 4-7                    | 1                     | BLS       | Yes          | Yes   | Yes      | No                |
| P9    | 40      | M   | 9             | 0-5      | 0-3                    | 1                     | BLS       | Yes          | Yes   | Yes      | No                |
| P10   | 41      | F   | 9             | 6-10     | 0-3                    | >2                    | ILS       | Yes          | No    | No       | Yes               |

4 F/P:firefighter/police officer; M/F: male/female; CA:cardiac arrest; CPR:cardiopulmonary resuscitation;  
 5 PLS/ILS/BLS: pediatric life support/immediate life support/basic life support; Chest kompr:chest compressions;  
 6 Defibr:defibrillation

7 \*Automated External Defibrillator applied and electric chock administered.

8 † Healthcare education besides regular professional training as firefighter/police officer.

9  
 10 The total number of CIs were 60, varying from one to five per participant. Police officers  
 11 described in median three CIs, compared to two for the firefighters. During the analysis three  
 12 time sequences emerged which reflects the temporal continuity of the OHCA situation: 1)

1 Preparedness, 2) Managing the scene, 3) The aftermath. (Figure 1). They are presented with  
2 suitable citations to highlight important aspects of each time sequence. The firefighters are  
3 referred to as “F” and the police officers as “P”.

#### 4 **Preparedness**

5 This time sequence comprises the response time, which is defined as from incoming  
6 emergency call received at the EMCC, to arrival of FRs at the scene.

#### 7 **Information**

8 Information deficit about the case was described as a considerable problem and caused stress  
9 and frustration amongst FRs. Especially when not finding the address, entry code to the  
10 building, or when there was no bystanders present showing the way.

11 *“We were trying to find the address; we were on the right street but we couldn’t find the right  
12 number....//...We started to feel frustration building up: Damn! We can’t find it.”* (F10)

#### 13 **Expectations**

14 Expectations were grounded in the participants’ previous experiences and mental pictures of  
15 what was expected to happen. If the victim’s characteristic was not communicated by the  
16 EMCC, both firefighters and police officers described that they had a preconceived perception  
17 of the victim as an older person. Valuable time for both technical and mental preparations  
18 could then be delayed if the victim proved to be a child or a young adult.

#### 19 **Managing the scene**

20 The time sequence was defined as from when the FRs vehicle stops at the address, to  
21 departing from the location.

## **The environment**

To be able to start CPR the FRs had to take control over the environment. Threats from bystanders and traffic caused anxiety, especially if there were few FRs in place from the beginning and they had to focus mainly on the victim, instead of prioritizing their own safety first.

*“So there we were in the middle of the motorway doing compressions, we were like, just right there, in the middle of the road, doing compressions.”* (F10)

Obstacles had to be taken care of, i.e. extraction from vehicles, removing furniture, or placing the victim in supine position to be able to start resuscitation.

## **The victim**

The victim could be described in both a technical and emotional way as heavy, still warm, or disgusting to take care of when regurgitation had occurred. Performing manual chest compressions was recounted by FRs as a repulsive task depending on flail chest caused by the resuscitation.

*“What I often think about is that when you do compressions, ribs get broken and I think that is so horrible. That’s really the thing that affects me the most, whenever I do compressions or when I think about cardiac arrest alarms.”* (F6)

When futile to resuscitate the victim, FRs often described the situation as sad or disappointing, especially when young people died in accidents or drug abuse. The mental strain could be considerable if the FRs children were at similar age as the deceased.

*“It was a young girl. It just feels so damned awful and you know when you’ve got two girls of your own as well, it just feels awful....//...they had taken cocaine, amphetamine...//* (F5)

1  
2  
3 1 Managing the airway was specified to be the most difficult technical skill, especially among  
4  
5 2 the police officers. This is also shown in Table 3 were six (60%) of the police officers used  
6  
7 3 compressions-only technique when resuscitating.  
8  
9

#### 10 4 **The bystanders**

11  
12 5 Comforting and taking care of bystanders was an extensive part of the assignment and many  
13  
14 6 of the FRs expressed how laborious this task could be. Lack of education in handling  
15  
16 7 emotional crisis after a cardiac arrest was emphasized. There were also no clear instructions  
17  
18 8 where the FRs responsibility ended when the EMS had left. To leave an elderly person alone  
19  
20 9 afterwards when the spouse had passed away was expressed as difficult.  
21  
22

23  
24  
25 10 *“I think we stayed there for almost an hour after the ambulance had left...//...She had some*  
26  
27 11 *problems walking, this old lady. So we put lots of bottles of juice and stuff by the armchair*  
28  
29 12 *where she used to sit so she wouldn't have to walk about and fetch things, because that was*  
30  
31 13 *what her husband had done for her, before he had his cardiac arrest. (F12)*  
32  
33

34  
35 14 Although protective towards the bystanders, FRs could also be critical. Especially personnel  
36  
37 15 in elderly care facilities were described as passive and not knowing how to act in emergency  
38  
39 16 situations.  
40  
41

#### 42 17 **Self-efficacy**

43  
44  
45 18 The FRs were moving between confidence and doubt when talking about their own capacity  
46  
47 19 in the OHCA situation. A circumstance mentioned was when the case was not a cardiac arrest  
48  
49 20 but some other illness. To make medical decisions before arrival of EMS without appropriate  
50  
51 21 training in first aid was described as extremely difficult and stressful, especially for the police  
52  
53 22 officers.  
54  
55

56  
57 23 *“I don't have any medical training; I could see that half of the brain was out, maybe it works*  
58  
59 24 *anyway, I don't have enough knowledge to decide.” (P5)*  
60

1 The FRs could describe fear of doing more harm than good, but also satisfaction with their  
2 own work, knowing that they had played a significant role for the outcome.

#### 3 4 **The rescue team**

5 Pronounced feelings of togetherness and dependence were noticeable, and the FRs trusted  
6 each other's ability to manage critical situations. Protocols for handling OHCA situations,  
7 especially among the firefighters, were expressed as "*our guiding star*" (F9), and they could  
8 also describe a clear structure for teamwork. This was not marked among the police officers  
9 who could feel loneliness and insufficiency if first in place, especially in more difficult  
10 OHCA cases.

#### 11 **The aftermath**

12  
13 The aftermath was when no more actions were taken by FRs in conjunction with the victim or  
14 bystanders, to as long memories were preserved, which could be years.

#### 15 **Caring for the rescuers**

16 **After tough assignments bodily symptoms, spinning thoughts and imprinted memories**  
17 **were reported in terms of "*never forgetting*" (P2), and "*stuck in my head*". (P5)**

18  
19 *//... "and I just have to pass by the place, I don't think there has ever been a time when I*  
20 *haven't thought about it, I mean, every time I walk past or drive past this place, I think about*  
21 *this." ...// (P6)*

22 Assessment and defusing afterwards occurred more often among equal colleagues rather than  
23 meetings initiated by superior officers. Inputs from others about the case and own  
24 performance were considered positive and could ease the pressure, but several FRs called for  
25 a more pronounced responsibility from the heads of the department. The participants  
26 expressed that occupational stress could be avoided if stress management took place regularly.

1  
2  
3 1 Repression was a strategy for coping by some FRs, others thought this could cause long term  
4  
5 2 impairment of the ability to feel empathy. A positive experience afterwards was if the  
6  
7 3 survivor came to visit the FRs at the fire- or police station. The survivors were seen as  
8  
9 4 reminders of success.

## 5 **Discussion**

6  
7 The aim of this interview study was to explore FRs experiences of participating in a dual  
8  
9 8 dispatch programme in case of suspected OHCA. Our analysis of recounted critical incidents  
10  
11 9 revealed three distinct time sequences regarding the cardiac arrest event described by the  
12  
13 10 participants (Figure 1). Our main findings in each time sequence were: 1) Lack of information  
14  
15 11 from EMCC about the victim caused frustration amongst FRs. 2) Perceived uncertainty in  
16  
17 12 performing CPR, especially concerning rescue breaths. To handle psychological reactions  
18  
19 13 amongst bystanders after an OHCA could be overwhelming. 3) FRs were missing discussion  
20  
21 14 after mission with participating colleagues and superior officers, especially after tough cases.  
22  
23 15 Information deficit from EMCC was a main concern for the FRs. However, information could  
24  
25 16 be missing for the dispatchers in time for call-out due to language barriers or difficulties  
26  
27 17 detecting if it is a true cardiac arrest or not.<sup>21 22</sup> EMS personnel have previously described  
28  
29 18 similar concerns regarding dispatch.<sup>23</sup>  
30  
31 19 Uncertainty could emerge if it was not an OHCA, but seizures or intoxication for example.  
32  
33 20 Both firefighters and police officers therefore expressed a need of more thorough education in  
34  
35 21 first aid. Regular training and education is also a matter of concern in EMS organizations  
36  
37 22 taking care of OHCA victims.<sup>24</sup> Handling the airway appears to be a subject for improvement  
38  
39 23 as reported earlier.<sup>14</sup> The ERC guidelines recommend that all rescuers trained and able to  
40  
41 24 perform CPR should combine chest compressions and rescue breaths.<sup>18</sup> However, only five  
42  
43 25 (50%) of the police officers had undergone annual training in CPR, and they expressed that

1 chest compression–only technique was preferred as an easier way of managing the situation  
2 (Table 3). The police force in Stockholm County joined the dual dispatch programme later  
3 compared to the firefighters, therefore the police officers have less experience in participating  
4 in cardiac arrest alarms.<sup>25</sup> In the interviews the police officers expressed more doubts about  
5 their self-efficacy<sup>26</sup> than the firefighters, especially concerning technical skills. To attach  
6 defibrillation pads and deliver countershocks was not much discussed by the police officers.  
7 This could be a consequence of the police being last summoned in OHCA alarms due to  
8 technicalities in the dispatch system. Other personnel prior to the police patrol have often  
9 already started treatment. In comparison, 686 firefighters in a survey, 24% had never applied  
10 an AED and 3% felt very uncomfortable doing so.<sup>27</sup> Application rates and retention could  
11 improve if FRs underwent frequent targeted hands-on AED training.<sup>28 29</sup> Stressful cardiac  
12 arrest situations were described in detail, despite a lapse of several months or years since the  
13 events. Adverse psychological effects after long-term exposure of traumatic events such as  
14 stress, anxiety, depression and posttraumatic stress disorder has been reported amongst  
15 FRs.<sup>30-32</sup> Several of the FRs discussed the need to ventilate the case among colleagues, and  
16 also the absence of organized case discussions after the mission.

17 A limitation of the study was that all participants worked in the most densely populated  
18 County in Sweden with high access to prehospital resources. Including FRs from other parts  
19 of the country would probably have generated other experiences, especially in low density  
20 populated areas where there are few rescuers available. Only one of the firefighters was  
21 female, which could have affected the results. The uneven gender distribution reflects the fact  
22 that only 5.5% of all firefighters in Sweden are women.<sup>33</sup> The police officers had a more even  
23 gender distribution,

24 In a qualitative study generalization is not possible; instead the concept of trustworthiness is  
25 highlighted. Credibility was obtained by peer debriefing of all steps in the analysis (EJA, PN).



1  
2  
3 1 The interviews were all conducted by the first author (IHA), which increased the likelihood  
4  
5 2 they were performed in the same way. The participants were recruited through different  
6  
7 3 approaches to reflect a representative sample of first responders in the County, thus increasing  
8  
9 4 the transferability. Moreover, the researchers (IHA, PN, JH, LS) had a profound knowledge of  
10  
11 5 the research field of OHCA and implementation of dual dispatch systems both local and  
12  
13 6 national, which strengthens the results.  
14  
15  
16  
17

## 18 7 **Conclusion**

19 8  
20 9 Participating in dual dispatch in case of a suspected OHCA was often described as a complex  
21  
22 10 process by first responders. Detailed information about the case and the location was crucial  
23  
24 11 for the preparedness, and information deficits caused stress and incorrect perceptions about  
25  
26 12 the victim. Technical challenges of performing CPR and managing the airway was prominent.  
27  
28 13 The need of regular team training and education in first aid was requested as well as  
29  
30 14 knowledge about psychological reactions amongst bystanders after an OHCA. Providing case  
31  
32 15 discussions and opportunities to give and receive feedback about the case is a main task for  
33  
34 16 the leadership in the first responder organizations.  
35  
36  
37  
38  
39

## 40 17 **Conflicts of Interest**

41 18 None.

## 42 19 **Acknowledgements**

43 20  
44 21 We wish to thank all participating firefighters and police officers. Financial support has been  
45  
46 22 granted from The Laerdal Foundation in Norway, the Swedish Heart–Lung Foundation and  
47  
48 23 Stig Holmberg Scholarship.  
49  
50  
51  
52  
53  
54  
55  
56  
57  
58  
59  
60

## References

1. Baekgaard JS, Viereck S, Moller TP, et al. The Effects of Public Access Defibrillation on Survival After Out-of-Hospital Cardiac Arrest: A Systematic Review of Observational Studies. *Circulation* 2017;**136**(10):954-65. doi: 10.1161/circulationaha.117.029067
2. Myerburg RJ, Fenster J, Velez M, et al. Impact of community-wide police car deployment of automated external defibrillators on survival from out-of-hospital cardiac arrest. *Circulation* 2002;**106**(9):1058-64.
3. Hawkins SC, Shapiro AH, Sever AE, et al. The role of law enforcement agencies in out-of-hospital emergency care. *Resuscitation* 2007;**72**(3):386-93. doi: 10.1016/j.resuscitation.2006.07.021
4. Hansen CM, Kragholm K, Granger CB, et al. The role of bystanders, first responders, and emergency medical service providers in timely defibrillation and related outcomes after out-of-hospital cardiac arrest: Results from a statewide registry. *Resuscitation* 2015;**96**:303-9. doi: 10.1016/j.resuscitation.2015.09.002
5. Becker L, Husain S, Kudenchuk P, et al. Treatment of cardiac arrest with rapid defibrillation by police in King County, Washington. *Prehosp Emerg Care* 2014;**18**(1):22-7. doi: 10.3109/10903127.2013.825353
6. Hollenberg J, Riva G, Bohm K, et al. Dual dispatch early defibrillation in out-of-hospital cardiac arrest: the SALSA-pilot. *Eur Heart J* 2009;**30**(14):1781-9. doi: 10.1093/eurheartj/ehp177
7. Nordberg P, Jonsson M, Forsberg S, et al. The survival benefit of dual dispatch of EMS and fire-fighters in out-of-hospital cardiac arrest may differ depending on population density-a prospective cohort study. *Resuscitation* 2015;**90**:143-9. doi: 10.1016/j.resuscitation.2015.02.036
8. Axelsson A, Herlitz J, Fridlund B. How bystanders perceive their cardiopulmonary resuscitation intervention; a qualitative study. *Resuscitation* 2000;**47**(1):71-81.
9. Weslien M, Nilstun T, Lundqvist A, et al. When the unreal becomes real: family members' experiences of cardiac arrest. *Nurs Crit Care* 2005;**10**(1):15-22.
10. Ann-Britt T, Ella D, Johan H, et al. Spouses' experiences of a cardiac arrest at home: an interview study. *Eur J Cardiovasc Nurs* 2010;**9**(3):161-7. doi: 10.1016/j.ejcnurse.2009.12.005
11. Moller TP, Hansen CM, Fjordholt M, et al. Debriefing bystanders of out-of-hospital cardiac arrest is valuable. *Resuscitation* 2014;**85**(11):1504-11 doi: 10.1016/j.resuscitation.2014.08.006
12. Malta Hansen C, Rosenkranz SM, Folke F, et al. Lay Bystanders' Perspectives on What Facilitates Cardiopulmonary Resuscitation and Use of Automated External Defibrillators in Real Cardiac Arrests. *J Am Heart Assoc* 2017;**6**(3). doi: 10.1161/jaha.116.004572
13. Elmqvist C, Brunt D, Fridlund B, et al. Being first on the scene of an accident--experiences of 'doing' prehospital emergency care. *Scand J Caring Sci* 2010;**24**(2):266-73. doi: 10.1111/j.1471-6712.2009.00716.x
14. Davies E, Maybury B, Colquhoun M, et al. Public access defibrillation: psychological consequences in responders. *Resuscitation* 2008;**77**(2):201-6. doi: 10.1016/j.resuscitation.2007.11.012
15. Flanagan JC. The critical incident technique. *Psychol Bull* 1954;**51**(4):327-58.
16. Krippendorff K. *Content analysis: An introduction to its methodology*. Thousands Oaks, Calif: SAGE Publications, 2013.

17. Lindstrom V, Bohm K, Kurland L. Prehospital care in Sweden. From a transport organization to advanced healthcare. *Notf Rett Med* 2015;**18**(2):107-09. doi: 10.1007/s10049-015-1989-1
18. Perkins GD, Handley AJ, Koster RW, et al. European Resuscitation Council Guidelines for Resuscitation 2015: Section 2. Adult basic life support and automated external defibrillation. *Resuscitation* 2015;**95**:81-99. doi: 10.1016/j.resuscitation.2015.07.015
19. Schluter J, Seaton P, Chaboyer W. Critical incident technique: a user's guide for nurse researchers. *J Adv Nurs* 2008;**61**(1):107-14. doi: 10.1111/j.1365-2648.2007.04490.x
20. Patton MQ. *Qualitative research & evaluation methods: Integrating theory and practice*. Thousand Oaks, Calif: SAGE Publications, 2015.
21. Ek B, Svedlund M. Registered nurses' experiences of their decision-making at an Emergency Medical Dispatch Centre. *J Clin Nurs* 2015;**24**(7-8):1122-31. doi: 10.1111/jocn.12701
22. Berdowski J, Beekhuis F, Zwinderman AH, et al. Importance of the first link: description and recognition of an out-of-hospital cardiac arrest in an emergency call. *Circulation* 2009;**119**(15):2096-102. doi: 10.1161/circulationaha.108.768325
23. Sundstrom BW, Dahlberg K. Being prepared for the unprepared: a phenomenology field study of Swedish prehospital care. *J Emerg Nurs* 2012;**38**(6):571-7. doi: 10.1016/j.jen.2011.09.003
24. Larsson R, Engstrom A. Swedish ambulance nurses' experiences of nursing patients suffering cardiac arrest. *Int J Nurs Pract* 2013;**19**(2):197-205. doi: 10.1111/ijn.12057
25. Nordberg P, Hollenberg J, Rosenqvist M, et al. The implementation of a dual dispatch system in out-of-hospital cardiac arrest is associated with improved short and long term survival. *Eur Heart J Acute Cardiovasc Care* 2014;**3**(4):293-303. doi: 10.1177/2048872614532415
26. Bandura A. Self-efficacy: toward a unifying theory of behavioral change. *Psychol Rev* 1977;**84**(2):191-215.
27. Lerner EB, Hinchey PR, Billittier AJ. A survey of first-responder firefighters' attitudes, opinions, and concerns about their automated external defibrillator program. *Prehosp Emerg Care* 2003;**7**(1):120-4.
28. Woollard M, Whitfield R, Newcombe RG, et al. Optimal refresher training intervals for AED and CPR skills: a randomised controlled trial. *Resuscitation* 2006;**71**(2):237-47. doi: 10.1016/j.resuscitation.2006.04.005
29. Greif R, Lockey AS, Conaghan P, et al. European Resuscitation Council Guidelines for Resuscitation 2015: Section 10. Education and implementation of resuscitation. *Resuscitation* 2015;**95**:288-301. doi: 10.1016/j.resuscitation.2015.07.032
30. Conn SM, Butterfield LD. Coping with secondary traumatic stress by general duty police officers: Practical implications. *CJC-RCC* 2013;**47**(2):272-98.
31. Levy-Gigi E, Richter-Levin G, Keri S. The hidden price of repeated traumatic exposure: different cognitive deficits in different first-responders. *Front Behav Neurosci* 2014;**8**:281. doi: 10.3389/fnbeh.2014.00281
32. Skeffington PM, Rees CS, Mazzucchelli T. Trauma exposure and post-traumatic stress disorder within fire and emergency services in Western Australia. *Aust J Psychol* 2017;**69**(1):20-28. doi: 10.1111/ajpy.12120
33. Swedish Civil Contingencies Agency. Gender equality in numbers 2017. (<https://www.msb.se/sv/Insats--beredskap/Jamstallldhet--mangfald/Jamstallldhet-i-siffror/>) Accessed 010419.

1  
2  
3  
4  
5  
6  
7  
8  
9  
10  
11  
12  
13  
14  
15  
16  
17  
18  
19  
20  
21  
22  
23  
24  
25  
26  
27  
28  
29  
30  
31  
32  
33  
34  
35  
36  
37  
38  
39  
40  
41  
42  
43  
44  
45  
46  
47  
48  
49  
50  
51  
52  
53  
54  
55  
56  
57  
58  
59  
60

**Time sequences**

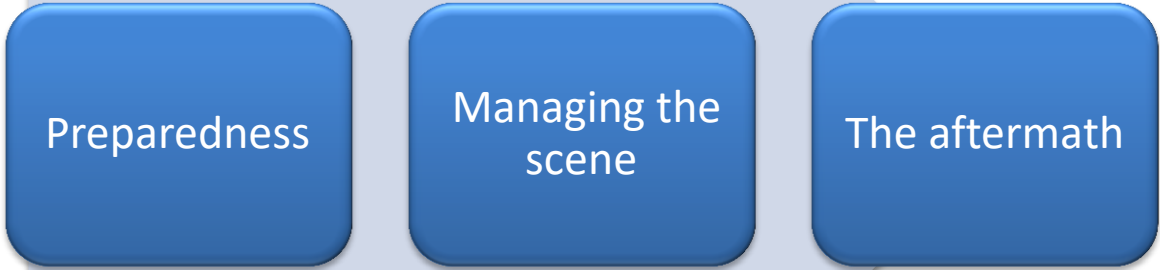

**Categories**

**Sub-categories**

|                                                        |                                                             |                                                              |
|--------------------------------------------------------|-------------------------------------------------------------|--------------------------------------------------------------|
| <b>Preparedness</b><br>- Expectations<br>- Information | <b>The environment</b><br>- Safety<br>- Creating work space | <b>Caring for the rescuers</b><br>- Assessment<br>- Memories |
|                                                        | <b>The victim</b><br>- Technique<br>- Sentiments            |                                                              |
|                                                        | <b>The bystanders</b><br>- Protection<br>- Impact           |                                                              |
|                                                        | <b>Self-efficacy</b><br>- Confidence<br>- Doubt             |                                                              |
|                                                        | <b>The rescue team</b><br>- Dependence<br>- Standards       |                                                              |

## COREQ (COnsolidated criteria for REporting Qualitative research) Checklist

A checklist of items that should be included in reports of qualitative research. You must report the page number in your manuscript where you consider each of the items listed in this checklist. If you have not included this information, either revise your manuscript accordingly before submitting or note N/A.

| Topic                                          | Item No. | Guide Questions/Description                                                                                                                              | Reported on Page No. |
|------------------------------------------------|----------|----------------------------------------------------------------------------------------------------------------------------------------------------------|----------------------|
| <b>Domain 1: Research team and reflexivity</b> |          |                                                                                                                                                          |                      |
| <i>Personal characteristics</i>                |          |                                                                                                                                                          |                      |
| Interviewer/facilitator                        | 1        | Which author/s conducted the interview or focus group?                                                                                                   |                      |
| Credentials                                    | 2        | What were the researcher's credentials? E.g. PhD, MD                                                                                                     |                      |
| Occupation                                     | 3        | What was their occupation at the time of the study?                                                                                                      |                      |
| Gender                                         | 4        | Was the researcher male or female?                                                                                                                       |                      |
| Experience and training                        | 5        | What experience or training did the researcher have?                                                                                                     |                      |
| <i>Relationship with participants</i>          |          |                                                                                                                                                          |                      |
| Relationship established                       | 6        | Was a relationship established prior to study commencement?                                                                                              |                      |
| Participant knowledge of the interviewer       | 7        | What did the participants know about the researcher? e.g. personal goals, reasons for doing the research                                                 |                      |
| Interviewer characteristics                    | 8        | What characteristics were reported about the interviewer/facilitator? e.g. Bias, assumptions, reasons and interests in the research topic                |                      |
| <b>Domain 2: Study design</b>                  |          |                                                                                                                                                          |                      |
| <i>Theoretical framework</i>                   |          |                                                                                                                                                          |                      |
| Methodological orientation and Theory          | 9        | What methodological orientation was stated to underpin the study? e.g. grounded theory, discourse analysis, ethnography, phenomenology, content analysis |                      |
| <i>Participant selection</i>                   |          |                                                                                                                                                          |                      |
| Sampling                                       | 10       | How were participants selected? e.g. purposive, convenience, consecutive, snowball                                                                       |                      |
| Method of approach                             | 11       | How were participants approached? e.g. face-to-face, telephone, mail, email                                                                              |                      |
| Sample size                                    | 12       | How many participants were in the study?                                                                                                                 |                      |
| Non-participation                              | 13       | How many people refused to participate or dropped out? Reasons?                                                                                          |                      |
| <i>Setting</i>                                 |          |                                                                                                                                                          |                      |
| Setting of data collection                     | 14       | Where was the data collected? e.g. home, clinic, workplace                                                                                               |                      |
| Presence of non-participants                   | 15       | Was anyone else present besides the participants and researchers?                                                                                        |                      |
| Description of sample                          | 16       | What are the important characteristics of the sample? e.g. demographic data, date                                                                        |                      |
| <i>Data collection</i>                         |          |                                                                                                                                                          |                      |
| Interview guide                                | 17       | Were questions, prompts, guides provided by the authors? Was it pilot tested?                                                                            |                      |
| Repeat interviews                              | 18       | Were repeat interviews carried out? If yes, how many?                                                                                                    |                      |
| Audio/visual recording                         | 19       | Did the research use audio or visual recording to collect the data?                                                                                      |                      |
| Field notes                                    | 20       | Were field notes made during and/or after the interview or focus group?                                                                                  |                      |
| Duration                                       | 21       | What was the duration of the interviews or focus group?                                                                                                  |                      |
| Data saturation                                | 22       | Was data saturation discussed?                                                                                                                           |                      |
| Transcripts returned                           | 23       | Were transcripts returned to participants for comment and/or                                                                                             |                      |

| Topic                                  | Item No. | Guide Questions/Description                                                                                                        | Reported on Page No. |
|----------------------------------------|----------|------------------------------------------------------------------------------------------------------------------------------------|----------------------|
|                                        |          | correction?                                                                                                                        |                      |
| <b>Domain 3: analysis and findings</b> |          |                                                                                                                                    |                      |
| <i>Data analysis</i>                   |          |                                                                                                                                    |                      |
| Number of data coders                  | 24       | How many data coders coded the data?                                                                                               |                      |
| Description of the coding tree         | 25       | Did authors provide a description of the coding tree?                                                                              |                      |
| Derivation of themes                   | 26       | Were themes identified in advance or derived from the data?                                                                        |                      |
| Software                               | 27       | What software, if applicable, was used to manage the data?                                                                         |                      |
| Participant checking                   | 28       | Did participants provide feedback on the findings?                                                                                 |                      |
| <i>Reporting</i>                       |          |                                                                                                                                    |                      |
| Quotations presented                   | 29       | Were participant quotations presented to illustrate the themes/findings?<br>Was each quotation identified? e.g. participant number |                      |
| Data and findings consistent           | 30       | Was there consistency between the data presented and the findings?                                                                 |                      |
| Clarity of major themes                | 31       | Were major themes clearly presented in the findings?                                                                               |                      |
| Clarity of minor themes                | 32       | Is there a description of diverse cases or discussion of minor themes?                                                             |                      |

Developed from: Tong A, Sainsbury P, Craig J. Consolidated criteria for reporting qualitative research (COREQ): a 32-item checklist for interviews and focus groups. *International Journal for Quality in Health Care*. 2007. Volume 19, Number 6: pp. 349 – 357

**Once you have completed this checklist, please save a copy and upload it as part of your submission. DO NOT include this checklist as part of the main manuscript document. It must be uploaded as a separate file.**

# BMJ Open

## Experiences among firefighters and police officers of responding to out-of-hospital cardiac arrest in a dual dispatch programme in Sweden: an interview study

|                                 |                                                                                                                                                                                                                                                                                                                                                                                                                                                                                 |
|---------------------------------|---------------------------------------------------------------------------------------------------------------------------------------------------------------------------------------------------------------------------------------------------------------------------------------------------------------------------------------------------------------------------------------------------------------------------------------------------------------------------------|
| Journal:                        | <i>BMJ Open</i>                                                                                                                                                                                                                                                                                                                                                                                                                                                                 |
| Manuscript ID                   | bmjopen-2019-030895.R1                                                                                                                                                                                                                                                                                                                                                                                                                                                          |
| Article Type:                   | Original research                                                                                                                                                                                                                                                                                                                                                                                                                                                               |
| Date Submitted by the Author:   | 23-Aug-2019                                                                                                                                                                                                                                                                                                                                                                                                                                                                     |
| Complete List of Authors:       | Hasselqvist-Ax, Ingela ; Karolinska institutet, Dept. of Cardiology, Centre for Resuscitation Science<br>Nordberg, Per; Karolinska institutet, Dept. of Cardiology, Centre for Resuscitation Science<br>Svensson, Leif; Karolinska Institute, Department of Medicine<br>Hollenberg, Jacob; Karolinska Institutet, Department of Medicine, Center for Resuscitation Science<br>Joelsson-Alm, Eva; Karolinska Institutet, Dept. of Clinical Science and Education, Södersjukhuset |
| <b>Primary Subject Heading</b>: | Qualitative research                                                                                                                                                                                                                                                                                                                                                                                                                                                            |
| Secondary Subject Heading:      | Emergency medicine                                                                                                                                                                                                                                                                                                                                                                                                                                                              |
| Keywords:                       | Cardiopulmonary Resuscitation, Critical Incident Technique, Firefighters, First Responders, Out-of-Hospital Cardiac Arrest, Police Officers                                                                                                                                                                                                                                                                                                                                     |
|                                 |                                                                                                                                                                                                                                                                                                                                                                                                                                                                                 |

SCHOLARONE™  
Manuscripts

1  
2  
3 **Experiences among firefighters and police officers of responding to out-of-**  
4 **hospital cardiac arrest in a dual dispatch programme in Sweden: an**  
5 **interview study**  
6  
7  
8  
9

10 Ingela Hasselqvist-Ax,<sup>1</sup> Per Nordberg,<sup>2</sup> Leif Svensson,<sup>2</sup> Jacob Hollenberg,<sup>2</sup> Eva Joelsson-  
11 Alm<sup>3</sup>  
12  
13  
14

15 <sup>1</sup>Ingela Hasselqvist-Ax, RN, PhD, Centre for Resuscitation Science, Department of Medicine,  
16 Solna, Karolinska Institutet, Swedish Resuscitation Council, Box 5182, SE-12118  
17 Johanneshov, Sweden. (ORCID 0000-0001-5081-6532)  
18  
19

20 <sup>2</sup>Per Nordberg, MD, PhD, Centre for Resuscitation Science, Department of Medicine, Solna,  
21 Karolinska Institutet and Section of Cardiology, South General Hospital, SE-118 83  
22 Stockholm, Sweden  
23  
24

25 <sup>2</sup>Leif Svensson, MD, PhD, Centre for Resuscitation Science, Department of Medicine, Solna,  
26 Karolinska Institutet, South General Hospital, SE-118 83 Stockholm, Sweden  
27  
28

29 <sup>2</sup>Jacob Hollenberg, MD, PhD, Centre for Resuscitation Science, Department of Medicine,  
30 Solna, Karolinska Institutet, Section of Cardiology, South General Hospital, SE-118 83  
31 Stockholm, Sweden  
32  
33

34 <sup>3</sup>Eva Joelsson-Alm, MSN, PhD, Department of Clinical Science and Education, Karolinska  
35 Institutet, Section of Anesthesiology and Intensive Care, South General Hospital, SE-118 83  
36 Stockholm, Sweden.  
37  
38

39  
40  
41  
42  
43  
44  
45  
46  
47  
48  
49 Correspondence to

50  
51 Ingela Hasselqvist-Ax

52  
53 E-mail (1): [ingela.hasselqvist-ax@hlr.nu](mailto:ingela.hasselqvist-ax@hlr.nu)

54  
55 E-mail (2): [ingela.hasselqvist-ax@ki.se](mailto:ingela.hasselqvist-ax@ki.se)

56  
57 Abstract: 247

58  
59 Article: 3347  
60



## Abstract

**Objectives** The objective of this study was to explore firefighters' and police officers' experiences of responding to out-of-hospital cardiac arrest in a dual dispatch programme.

**Design** A qualitative interview study with semi-structured, open-ended questions where Critical Incident Technique (CIT) was used to collect recalled cardiac arrest situations from the participants' narratives. The interviews were transcribed verbatim and analyzed with inductive content analysis.

**Setting** The County of Stockholm, Sweden.

**Participants** Police officers (n=10), and firefighters (n=12) participating in a dual dispatch programme with Emergency Medical Services in case of suspected out-of-hospital cardiac arrest of cardiac or non-cardiac origin.

**Results** Analysis of 60 critical incidents was performed resulting in three consecutive time sequences (Preparedness, Managing the scene, and The aftermath) with related categories, where first responders described the complexity of the cardiac arrest situation. Detailed information about the case and the location was crucial for the preparedness, and information deficits created stress, frustration and incorrect perceptions about the victim. The technical challenges of performing cardiopulmonary resuscitation and managing the airway, was prominent and the need of regular team training and education in first aid was highlighted.

**Conclusions** Participating in dual dispatch in case of suspected out-of-hospital cardiac arrest was described as a complex technical and emotional process by first responders. Providing case discussions and opportunities to give, and receive feedback about the case is a main task for the leadership in the organizations to diminish stress among personnel and to improve future OHCA missions.

### Strengths and limitations of this study

- Few other studies concerning first responders' experiences about participating in dual dispatch with Emergency Medical Services in out-of-hospital cardiac arrest have previously been published.
- The study provides new insights from first responders about the complex situation of out-of-hospital cardiac arrest.
- One limitation of the study is the risk of recall bias.
- Qualitative studies propose a deeper understanding of a phenomenon, but the results cannot be generalized to any other group of first responders or organizations. However new theories and fields of research can be developed from the results.

### Keywords

Cardiopulmonary Resuscitation; Critical Incident Technique; Firefighters; First responders; Out-of-Hospital Cardiac Arrest; Police officers

## 1 Introduction

2 To improve outcome in out-of-hospital cardiac arrest (OHCA) several prehospital measures  
3 have been introduced worldwide, e.g. different types of public access defibrillation programs<sup>1</sup>  
4 and implementation of dual dispatch systems including emergency medical services (EMS),  
5 firefighters and/or police officers i.e. first responders (FRs), trained in Basic Life Support  
6 (BLS) dispatched in case of suspected OHCA.<sup>2-5</sup> In the County of Stockholm, Sweden, a dual  
7 dispatch system involving EMS and firefighters was introduced in 2005.<sup>6</sup> Police officers were  
8 fully integrated in the OHCA alarm system in 2012.<sup>7</sup> Experiences of performing  
9 cardiopulmonary resuscitation (CPR) outside hospital are mostly explored within the  
10 bystander population.<sup>8-12</sup> Previous research in regards to FRs experiences of participating in  
11 emergency call-outs has been described in the context of traffic accidents<sup>13</sup> and  
12 psychological consequences about performing CPR and using an automated external  
13 defibrillator (AED).<sup>14</sup>

14 The aim of this interview study was to explore firefighters' and police officers' experiences of  
15 saving lives in OHCA in a dual dispatch programme.

## 16 Methods

### 17 Design

18 This was an interview study where data were analyzed by using Critical Incident Technique  
19 (CIT)<sup>15</sup> and inductive qualitative content analysis.<sup>16</sup> A "critical incident" (CI), in this study is  
20 a description of a cardiac arrest situation recalled as important by the participants. OHCA  
21 were included independent of etiology (medical or non-medical) and age of the victim.

### 22 Study setting and dispatch

23 The study was conducted in Stockholm County covering 6519 km<sup>2</sup> with 2.3 milj. inhabitants  
24 living in densely populated urban areas, as well as in more rural parts. In case of a suspected

1  
2  
3 1 OHCA the dispatchers at the Emergency Medical Communication Centre (EMCC) first  
4  
5 2 dispatches two ambulances staffed with specialist nurses and emergency medical technicians  
6  
7 3 performing advanced life support.<sup>17</sup> In special circumstances such as major trauma, drowning  
8  
9 4 and pediatric cardiac arrests, a physician-staffed rapid response vehicle is alerted. FRs trained  
10  
11 5 in BLS, and equipped with AEDs are also dispatched, primarily the fire fighters and thereafter  
12  
13 6 the police<sup>18</sup> The EMS, police force, and fire department are alerted by the common  
14  
15 7 emergency number (112). In Stockholm County there are 40 fire stations and 30 police  
16  
17 8 stations. Depending on time of day and type of vehicles being dispatched, the number of  
18  
19 9 attending staff varies between four and ten in average. The police are considered to be an  
20  
21 10 extra resource in OHCA, and cannot always engage depending on other ongoing missions.  
22  
23 11 Approximately 1200 confirmed OHCA occurs annually, and FRs are being dispatched in  
24  
25 12 estimated 70% of these cases.

### 13 **CPR training amongst FRs**

14  
15 15 Annual adult and pediatric BLS training is recommended for FRs by European guidelines in  
16  
17 16 CPR<sup>18</sup> and the Swedish Resuscitation Council. However compliance to these  
18  
19 17 recommendations could differ between participating organizations. It is mandatory for FRs to  
20  
21 18 start CPR if first on scene unless obvious signs of death are present.

### 19 **Participants**

20  
21 21 Eligible participants were firefighters and police officers with experiences of being dispatched  
22  
23 22 as first responders in OHCA. The recommended sample size in CIT depends on what activity  
24  
25 23 or behavior being studied. If the activity is relatively well-defined, a total number of 50 to 100  
26  
27 24 critical incidents (CIs) are needed for the analysis.<sup>15 19</sup> With an estimate of 2-4 CIs per  
28  
29 25 interview, a sample size of approximately 20 interviews was considered sufficient.

## 1 Data collection

2 The strategy used was a purposive sampling of key participants with knowledge from one or  
3 more cardiac arrest situations, with the main focus to collect as rich descriptions as possible.<sup>20</sup>

4 To obtain a variety of workplaces, different ages and gender three approaches for recruitment  
5 were used; 1) An invitation letter from the researchers was presented to the main

6 collaboration group for OHCA alarms in Stockholm County. 2) On the police report for

7 cardiac arrest alarms there was a request to contact the researchers for a voluntary interview.

8 3) Fire stations were directly contacted for recruitment of participants. All three approaches  
9 were used, and all voluntary participants who fulfilled the inclusion criteria were included.

10 The final study sample consisted of 22 participants; 12 firefighters representing four different

11 fire brigades, and 10 police officers from eight police stations throughout the County. The

12 participants received written information about the study and contact information to the

13 researchers before the interviews took place. An interview guide with open-ended semi-

14 structured questions was used (Table 1).

15 Table 1. Interview guide for collecting Critical Incidents

|                                                                                                                                                                                                                             |
|-----------------------------------------------------------------------------------------------------------------------------------------------------------------------------------------------------------------------------|
| 1. Can you describe a particular situation and the circumstances surrounding it when you have been dispatched to a person suffering from an out-of-hospital cardiac arrest? Please describe the circumstances and the time. |
| 2. Can you describe how you acted in this situation?                                                                                                                                                                        |
| 3. Can you describe how other persons acted in this situation?                                                                                                                                                              |
| 4. Can you describe how you reacted?                                                                                                                                                                                        |
| 5. What was the result of the situation?                                                                                                                                                                                    |
| 6. Do you want to add something more?                                                                                                                                                                                       |

16

1  
2  
3 1 Data of demographic character were also collected. The participants could choose the place  
4  
5 2 for the interview, and all except three took place at their regular workplaces. The interviews  
6  
7 3 lasted between 9 to 38 minutes (22 minutes in median), and were all conducted by the first  
8  
9 4 author (IHA), a nurse anesthetist and teacher with professional knowledge in OHCA research,  
10  
11 5 especially CPR/defibrillation and dual dispatch. The interviews were recorded with a digital  
12  
13 6 voice recorder (Olympus™ VN-7800PC), and transcribed verbatim by a secretary with  
14  
15 7 knowledge of cardiac arrest research. A pilot interview to test the questions in the interview  
16  
17 8 guide was performed in February 2015. No change of questions was needed. The pilot  
18  
19 9 interview contained rich material with descriptions from three CIs, and were therefore  
20  
21 10 included in the final analysis. The following interviews were carried out June 16<sup>th</sup> to  
22  
23 11 December 13<sup>th</sup> 2016.

## 12 **Data analysis**

13  
14 The analysis was performed as follows: 1) Identification of CIs as the unit of analysis in each  
15  
16 15 interview. The CIs were thereafter read repeatedly to gain a comprehensive view of the  
17  
18 16 whole. 2) Condensation of each CI into meaning units with the purpose to reduce the text and  
19  
20 17 preserve the core in the narrative. A meaning unit is close to the text and is not interpreted by  
21  
22 18 the researchers at this stage. 3) Interpretation and coding the meaning units into sub-  
23  
24 19 categories by the authors. 4) The sub-categories were thereafter merged into categories from  
25  
26 20 which time sequences were created (Table 2).

1 Table 2. Description of the analysis process

| Critical Incident (CI)                                                                                                                                                     | Condensed meaning units                                                                 | Sub-category | Category        | Time sequence      |
|----------------------------------------------------------------------------------------------------------------------------------------------------------------------------|-----------------------------------------------------------------------------------------|--------------|-----------------|--------------------|
| There was some sort of crack house; a younger girl had a cardiac arrest. // And then you think before going in, there is a second type of threat scenario when entering... | Crack house<br>Younger girl<br>Cardiac arrest<br>Think before going in<br>Second threat | Safety       | The environment | Managing the scene |

2 Excerpt from Critical Incident #1, (Firefighter #1)

3  
4 To ensure rigor and consistency of interpretation, the analysis was discussed by the  
5 researchers, and agreement was reached at every step after dialogue between the co-  
6 researchers, to ensure that all analyses were supported by the data. In the analysis, the  
7 participants were anonymized for the researchers.

### 8 **Ethical considerations**

9  
10 Written informed consent was obtained from the participants and information was given about  
11 the possibility to withdraw from the study without any reprisal. Participants were not entitled  
12 to financial remuneration or other benefits. The study was approved by the Regional Ethics  
13 Review Board in Stockholm, Sweden (registration number 2015/1091- 31/5).

### 14 **Patient and Public Involvement**

15 The patients and the public were not involved in planning or the design of this study.

## 17 **Results**

18  
19 Baseline characteristics are presented in Table 3. Median age was 36 years and the working  
20 experience as firefighter and police officer were 6.5 years in median for both professions.

1 Firefighters were predominantly men, and they had longer experience of being dispatched to  
 2 an OHCA than the participating police officers.

3 Table 3. Characteristics of participants (N=22)

| F/P<br>55/45<br>% | Age<br>(y)<br>Mean<br>=36 | Sex<br>M/F<br>77/23<br>% | Prof<br>exp.<br>(y)<br>Mean=<br>7.5 | No of<br>CA | Years in<br>OHCA<br>dispatch | Latest<br>CPR<br>course<br>(y)<br>Mean<br>=1 | CPR<br>level | CC<br>Yes/<br>No<br>100/0<br>% | Vent.<br>Yes/<br>No<br>73/27<br>% | Defibr.*<br>Yes/No<br>77/23<br>% | Health-<br>care edu.†<br>Yes/No<br>45/55<br>% |
|-------------------|---------------------------|--------------------------|-------------------------------------|-------------|------------------------------|----------------------------------------------|--------------|--------------------------------|-----------------------------------|----------------------------------|-----------------------------------------------|
| F1                | 23                        | M                        | 3.5                                 | 11-20       | 0-3                          | 1                                            | PLS/ILS      | Yes                            | Yes                               | Yes                              | Yes                                           |
| F2                | 47                        | M                        | 9.5                                 | >20         | 8-10                         | 1                                            | PLS          | Yes                            | Yes                               | Yes                              | Yes                                           |
| F3                | 26                        | M                        | 3.5                                 | 11-20       | 0-3                          | 1                                            | PLS/ILS      | Yes                            | Yes                               | Yes                              | No                                            |
| F4                | 43                        | M                        | 5                                   | >20         | 4-7                          | 1                                            | PLS/ILS      | Yes                            | Yes                               | Yes                              | Yes                                           |
| F5                | 50                        | M                        | 27                                  | >20         | 8-10                         | 1                                            | BLS          | Yes                            | Yes                               | Yes                              | No                                            |
| F6                | 54                        | M                        | 11                                  | >20         | 8-10                         | 1                                            | BLS          | Yes                            | Yes                               | Yes                              | Yes                                           |
| F7                | 43                        | M                        | 10                                  | >20         | 8-10                         | 1                                            | BLS          | Yes                            | Yes                               | Yes                              | No                                            |
| F8                | 28                        | M                        | 7                                   | 0-5         | 0-3                          | 1                                            | ILS          | Yes                            | Yes                               | No                               | Yes                                           |
| F9                | 35                        | M                        | 2                                   | 11-20       | 0-3                          | 1                                            | ILS          | Yes                            | Yes                               | Yes                              | No                                            |
| F10               | 36                        | M                        | 11                                  | >20         | 8-10                         | 1                                            | PLS          | Yes                            | Yes                               | Yes                              | No                                            |
| F11               | 27                        | F                        | 6                                   | >20         | 4-7                          | 1                                            | ILS          | Yes                            | Yes                               | Yes                              | No                                            |
| F12               | 28                        | M                        | 5                                   | 6-10        | 4-7                          | 1                                            | ILS          | Yes                            | Yes                               | Yes                              | Yes                                           |
| P1                | 40                        | M                        | 7                                   | >20         | 4-7                          | >2                                           | ILS          | Yes                            | No                                | Yes                              | No                                            |
| P2                | 31                        | F                        | 3                                   | 0-5         | 0-3                          | 1                                            | ILS          | Yes                            | No                                | No                               | Yes                                           |
| P3                | 30                        | M                        | 2                                   | 6-10        | 0-3                          | 1                                            | BLS          | Yes                            | Yes                               | Yes                              | No                                            |
| P4                | 43                        | M                        | 13                                  | >20         | 4-7                          | 1-2                                          | ILS          | Yes                            | No                                | No                               | Yes                                           |
| P5                | 26                        | M                        | 2                                   | 0-5         | 0-3                          | 1-2                                          | BLS          | Yes                            | No                                | Yes                              | Yes                                           |
| P6                | 38                        | F                        | 10                                  | 6-10        | 8-10                         | 1                                            | ILS          | Yes                            | Yes                               | Yes                              | No                                            |
| P7                | 28                        | F                        | 2.5                                 | 11-20       | 0-3                          | 1-2                                          | ILS          | Yes                            | No                                | No                               | No                                            |
| P8                | 33                        | M                        | 6                                   | 0-5         | 4-7                          | 1                                            | BLS          | Yes                            | Yes                               | Yes                              | No                                            |
| P9                | 40                        | M                        | 9                                   | 0-5         | 0-3                          | 1                                            | BLS          | Yes                            | Yes                               | Yes                              | No                                            |
| P10               | 41                        | F                        | 9                                   | 6-10        | 0-3                          | >2                                           | ILS          | Yes                            | No                                | No                               | Yes                                           |

4 F/P:firefighter/police officer; M/F:male/female; CA:cardiac arrest; CPR:cardiopulmonary resuscitation;  
 5 PLS/ILS/BLS; pediatric life support/immediate life support/basic life support; CC:chest compressions;  
 6 Defibr:defibrillation  
 7 \*Automated External Defibrillator applied and electric chock administered.  
 8 † Healthcare education besides regular professional training as firefighter/police officer.

9  
 10 The total number of CIs were 60, varying from one to five per participant. Police officers  
 11 described in median three CIs, compared to two for the firefighters. During the analysis seven  
 12 categories and 14 sub-categories emerged which reflects three major time sequences  
 13 describing the temporal continuity of the OHCA situation: 1) Preparedness, 2) Managing the  
 14 scene, 3) The aftermath (Figure 1). They are presented with suitable citations to highlight



1 important aspects of each time sequence. The firefighters are referred to as “F” and the police  
2 officers as “P”.

### 3 **Preparedness**

4 This time sequence comprises the response time, which is defined as from incoming  
5 emergency call received at the EMCC, to arrival of FRs at the scene.

### 6 **Information**

7 Information deficit about the case was described as a considerable problem and caused stress  
8 and frustration amongst FRs. Especially when not finding the address, entry code to the  
9 building, or when there was no bystanders present showing the way.

10 *“We were trying to find the address; we were on the right street but we couldn’t find the right  
11 number....//...We started to feel frustration building up: Damn! We can’t find it.” (F10)*

### 12 **Expectations**

13 Expectations were grounded in the participants’ previous experiences and mental pictures of  
14 what was expected to happen. If the victim’s characteristic was not communicated by the  
15 EMCC, both firefighters and police officers described that they had a preconceived perception  
16 of the victim as an older person. Valuable time for both technical and mental preparations  
17 could then be delayed if the victim proved to be a child or a young adult.

### 18 **Managing the scene**

19 The time sequence was defined as from when the FRs vehicle stops at the address, to  
20 departing from the location.

### 21 **The environment**

22  
23 To be able to start CPR the FRs had to take control over the environment. Threats from  
24 bystanders and traffic caused anxiety, especially if there were few FRs in place from the

1  
2  
3 1 beginning and they had to focus mainly on the victim, instead of prioritizing their own safety  
4  
5 2 first.

6  
7  
8 3 *“So there we were in the middle of the motorway doing compressions, we were like, just right*  
9  
10 4 *there, in the middle of the road, doing compressions.”* (F10)

11  
12  
13  
14 5 Obstacles had to be taken care of, i.e. extraction from vehicles, removing furniture, or placing  
15  
16 6 the victim in supine position to be able to start resuscitation.

17  
18  
19 7 **The victim**

20 8  
21 9 The victim could be described in both a technical and emotional way as heavy, still warm, or  
22  
23 10 disgusting to take care of when regurgitation had occurred. Performing manual chest  
24  
25 11 compressions was recounted by FRs as a repulsive task depending on flail chest caused by the  
26  
27 12 resuscitation.

28  
29  
30  
31  
32 13 *“What I often think about is that when you do compressions, ribs get broken and I think that is*  
33  
34 14 *so horrible. That’s really the thing that affects me the most, whenever I do compressions or*  
35  
36 15 *when I think about cardiac arrest alarms.”* (F6)

37  
38  
39 16 When futile to resuscitate the victim, FRs often described the situation as sad or  
40  
41 17 disappointing, especially when young people died in accidents or drug abuse. The mental  
42  
43 18 strain could be considerable if the FRs children were at similar age as the deceased.

44  
45  
46 19 *“It was a young girl. It just feels so damned awful and you know when you’ve got two girls of*  
47  
48 20 *your own as well, it just feels awful....//...they had taken cocaine, amphetamine...//* (F5)

49  
50  
51  
52 21 Managing the airway was specified to be the most difficult technical skill, especially among  
53  
54 22 the police officers. This is also shown in Table 3 were six (60%) of the police officers used  
55  
56 23 compressions-only technique when resuscitating.

## 1 **The bystanders**

2 Comforting and taking care of bystanders was an extensive part of the assignment and many  
3 of the FRs expressed how laborious this task could be. Lack of education in handling  
4 emotional crisis after a cardiac arrest was emphasized. There were also no clear instructions  
5 where the FRs responsibility ended when the EMS had left. To leave an elderly person alone  
6 afterwards when the spouse had passed away was expressed as difficult.

7 *“I think we stayed there for almost an hour after the ambulance had left...//...She had some*  
8 *problems walking, this old lady. So we put lots of bottles of juice and stuff by the armchair*  
9 *where she used to sit so she wouldn't have to walk about and fetch things, because that was*  
10 *what her husband had done for her, before he had his cardiac arrest. (F12)*

11 Although protective towards the bystanders, FRs could also be critical. Especially personnel  
12 in elderly care facilities were described as passive and not knowing how to act in OHCA  
13 situations.

## 14 **Self-efficacy**

15 The FRs were moving between confidence and doubt when talking about their own capacity  
16 in the OHCA situation. A circumstance mentioned was when the case was not a cardiac arrest  
17 but some other illness. To make medical decisions before arrival of EMS without appropriate  
18 training in first aid was described as extremely difficult and stressful, especially for the police  
19 officers.

20 *“I don't have any medical training; I could see that half of the brain was out, maybe it works*  
21 *anyway, I don't have enough knowledge to decide.” (P5)*

22 The FRs could describe fear of doing more harm than good, but also satisfaction with their  
23 own work, knowing that they had played a significant role for the outcome.

24

## 1           2           3           4           5           6           7           8           9           10           11           12           13           14           15           16           17           18           19           20           21           22           23           24           25           26           27           28           29           30           31           32           33           34           35           36           37           38           39           40           41           42           43           44           45           46           47           48           49           50           51           52           53           54           55           56           57           58           59           60

### 1   **The rescue team**

2   Pronounced feelings of togetherness and dependence were noticeable, and the FRs trusted  
3   each other's ability to manage critical situations. Protocols for handling OHCA situations,  
4   especially among the firefighters, were expressed as "*our guiding star*" (F9), and they could  
5   also describe a clear structure for teamwork. This was not marked among the police officers  
6   who could feel loneliness and insufficiency if first in place, especially in more difficult  
7   OHCA cases.

### 8   **The aftermath**

9  
10   The aftermath was when no more actions were taken by FRs in conjunction with the victim or  
11   bystanders, to as long memories were preserved, which could be years.

### 12   **Caring for the rescuers**

13   **After tough assignments bodily symptoms, spinning thoughts and imprinted memories**  
14   **were reported in terms of "*never forgetting*" (P2), and "*stuck in my head*". (P5)**

15  
16   *//... "and I just have to pass by the place, I don't think there has ever been a time when I*  
17   *haven't thought about it, I mean, every time I walk past or drive past this place, I think about*  
18   *this." ...// (P6)*

19   Assessment and defusing afterwards occurred more often among equal colleagues rather than  
20   meetings initiated by superior officers. Inputs from others about the case and own  
21   performance were considered positive and could ease the pressure, but several FRs called for  
22   a more pronounced responsibility from the heads of the department. The participants  
23   expressed that occupational stress could be avoided if stress management took place regularly.  
24   Repression was a strategy for coping by some FRs, others thought this could cause long term  
25   impairment of the ability to feel empathy. A positive experience afterwards was if the

1 survivor came to visit the FRs at the fire- or police station. The survivors were seen as  
2 reminders of success.

### 3 **Discussion**

4  
5 The aim of this interview study was to explore FRs experiences of participating in a dual  
6 dispatch programme in case of suspected OHCA. Our analysis of recounted critical incidents  
7 revealed three distinct time sequences regarding the cardiac arrest event described by the  
8 participants (Figure 1). Our main findings in each time sequence were: 1) Lack of information  
9 from EMCC about the victim caused frustration amongst FRs. 2) Perceived uncertainty in  
10 performing CPR, especially concerning rescue breaths. To handle psychological reactions  
11 amongst bystanders after an OHCA could be overwhelming. 3) FRs were missing discussion  
12 after mission with participating colleagues and superior officers, especially after tough cases.  
13 Information deficit from EMCC was a main concern for the FRs. However, information could  
14 be missing for the dispatchers in time for call-out due to language barriers or difficulties  
15 detecting if it is a true cardiac arrest or not.<sup>21 22</sup> EMS personnel have previously described  
16 similar concerns regarding dispatch.<sup>23</sup>  
17 Uncertainty could emerge if it was not an OHCA, but seizures or intoxication for example.  
18 Both firefighters and police officers therefore expressed a need of more thorough education in  
19 first aid. Regular training and education is also a matter of concern in EMS organizations  
20 taking care of OHCA victims.<sup>24</sup> Handling the airway appears to be a subject for improvement  
21 as reported earlier.<sup>14</sup> The ERC guidelines recommend that all rescuers trained and able to  
22 perform CPR should combine chest compressions and rescue breaths.<sup>18</sup> However, only five  
23 (50%) of the police officers had undergone annual training in CPR, and they expressed that  
24 chest compression-only technique was preferred as an easier way of managing the situation  
25 (Table 3). The police force in Stockholm County joined the dual dispatch programme later

1 compared to the firefighters, therefore the police officers have less experience in participating  
2 in cardiac arrest alarms.<sup>25</sup> In the interviews the police officers expressed more doubts about  
3 their self-efficacy<sup>26</sup> than the firefighters, especially concerning technical skills. To attach  
4 defibrillation pads and deliver countershocks was not much discussed by the police officers.  
5 This could be a consequence of the police being last summoned in OHCA alarms due to  
6 technicalities in the dispatch system. Other personnel prior to the police patrol have often  
7 already started treatment. In comparison, 686 firefighters in a survey, 24% had never applied  
8 an AED and 3% felt very uncomfortable doing so.<sup>27</sup> Application rates and retention could  
9 improve if FRs underwent frequent targeted hands-on AED training.<sup>28 29</sup> Stressful cardiac  
10 arrest situations were described in detail, despite a lapse of several months or years since the  
11 events. Adverse psychological effects after long-term exposure of traumatic events such as  
12 stress, anxiety, depression and posttraumatic stress disorder has been reported amongst  
13 FRs.<sup>30-32</sup> Several of the FRs discussed the need to ventilate the case among colleagues, and  
14 also the absence of organized case discussions after the mission.

15 A limitation of the study was that all participants worked in the most densely populated  
16 County in Sweden with high access to prehospital resources. Including FRs from other parts  
17 of the country would probably have generated other experiences, especially in low density  
18 populated areas where there are few rescuers available. Only one of the firefighters was  
19 female, which could have affected the results. The uneven gender distribution reflects the fact  
20 that only 5.5% of all firefighters in Sweden are women.<sup>33</sup> The police officers had a more  
21 evenly gender distribution.

22 Selecting volunteers for interviews could have introduced bias in terms of a non-  
23 representative sample. Different fire- and police stations around the County were thus chosen,  
24 as well as gender and varying ages among participants to obtain as rich information as  
25 possible about the research subject. There is always a risk of recall bias in interview studies,

1 especially if the incident took place months or years ago. All participants had however very  
2 clear memories of the recounted OHCA situations, and could describe them in detail.  
3 In a qualitative study generalization is not possible; instead the concept of trustworthiness is  
4 highlighted. Credibility was obtained by peer debriefing of all steps in the analysis (EJA, PN).  
5 The interviews were all conducted by the first author (IHA), which increased the likelihood  
6 they were performed in the same way. The participants were recruited through different  
7 approaches to reflect a representative sample of first responders in the County, thus increasing  
8 the transferability. Moreover, the research group has experiences in cardiology, out-of-  
9 hospital cardiac arrest, dual dispatch (PN, LS, JH), and other domains such as intensive care  
10 and qualitative studies (EJA). This strengthens the results, but also raises questions about  
11 reflexivity and bias, which were discussed during the whole process of collecting and  
12 interpreting data.

## 13 **Conclusion**

14  
15 Participating in dual dispatch in case of a suspected OHCA was often described as a complex  
16 process by first responders. Detailed information about the case and the location was crucial  
17 for the preparedness, and information deficits caused stress and incorrect perceptions about  
18 the victim. Technical challenges of performing CPR and managing the airway was prominent.  
19 The need of regular team training and education in first aid was requested as well as  
20 knowledge about psychological reactions amongst bystanders after an OHCA. Providing case  
21 discussions and opportunities to give and receive feedback about the case is a main task for  
22 the leadership in the first responder organizations.

23

24

## 1 Contributors

2 The study was designed by IHA and EJA. IHA recruited the participants and collected the  
3 data under the supervision of EJA. IHA, EJA and PN made substantial contributions to the  
4 analysis and interpretation of data. IHA drafted the manuscript. EJA, PN, LS and JH critically  
5 reviewed and revised the manuscript. All authors approved the final version of the manuscript  
6 for publication.

## 8 Data availability

9 Data can be made available upon request to the corresponding author.

## 10 Conflicts of Interest

11 None.

## 12 Acknowledgements

14 We wish to thank all participating firefighters and police officers.

## 15 Funding

16 Financial support has been granted from The Laerdal Foundation in Norway, the Swedish  
17 Heart–Lung Foundation and Stig Holmberg Scholarship.

## 18 References

- 19 1. Baekgaard JS, Viereck S, Moller TP, et al. The Effects of Public Access Defibrillation on  
20 Survival After Out-of-Hospital Cardiac Arrest: A Systematic Review of Observational  
21 Studies. *Circulation* 2017;**136**(10):954-65. doi: 10.1161/circulationaha.117.029067
- 22 2. Myerburg RJ, Fenster J, Velez M, et al. Impact of community-wide police car deployment  
23 of automated external defibrillators on survival from out-of-hospital cardiac arrest.  
24 *Circulation* 2002;**106**(9):1058-64.
- 25 3. Hawkins SC, Shapiro AH, Sever AE, et al. The role of law enforcement agencies in out-of-  
26 hospital emergency care. *Resuscitation* 2007;**72**(3):386-93. doi:  
27 10.1016/j.resuscitation.2006.07.021
- 28 4. Hansen CM, Kragholm K, Granger CB, et al. The role of bystanders, first responders, and  
29 emergency medical service providers in timely defibrillation and related outcomes  
30 after out-of-hospital cardiac arrest: Results from a statewide registry. *Resuscitation*  
31 2015;**96**:303-9. doi: 10.1016/j.resuscitation.2015.09.002



- 1 5. Becker L, Husain S, Kudenchuk P, et al. Treatment of cardiac arrest with rapid  
2 defibrillation by police in King County, Washington. *Prehosp Emerg Care*  
3 2014;**18**(1):22-7. doi: 10.3109/10903127.2013.825353
- 4 6. Hollenberg J, Riva G, Bohm K, et al. Dual dispatch early defibrillation in out-of-hospital  
5 cardiac arrest: the SALSA-pilot. *Eur Heart J* 2009;**30**(14):1781-9. doi:  
6 10.1093/eurheartj/ehp177
- 7 7. Nordberg P, Jonsson M, Forsberg S, et al. The survival benefit of dual dispatch of EMS and  
8 fire-fighters in out-of-hospital cardiac arrest may differ depending on population  
9 density-a prospective cohort study. *Resuscitation* 2015;**90**:143-9. doi:  
10 10.1016/j.resuscitation.2015.02.036
- 11 8. Axelsson A, Herlitz J, Fridlund B. How bystanders perceive their cardiopulmonary  
12 resuscitation intervention; a qualitative study. *Resuscitation* 2000;**47**(1):71-81.
- 13 9. Weslien M, Nilstun T, Lundqvist A, et al. When the unreal becomes real: family members'  
14 experiences of cardiac arrest. *Nurs Crit Care* 2005;**10**(1):15-22.
- 15 10. Ann-Britt T, Ella D, Johan H, et al. Spouses' experiences of a cardiac arrest at home: an  
16 interview study. *Eur J Cardiovasc Nurs* 2010;**9**(3):161-7. doi:  
17 10.1016/j.ejcnurse.2009.12.005
- 18 11. Moller TP, Hansen CM, Fjordholt M, et al. Debriefing bystanders of out-of-hospital  
19 cardiac arrest is valuable. *Resuscitation* 2014;**85**(11):1504-11 doi:  
20 10.1016/j.resuscitation.2014.08.006
- 21 12. Malta Hansen C, Rosenkranz SM, Folke F, et al. Lay Bystanders' Perspectives on What  
22 Facilitates Cardiopulmonary Resuscitation and Use of Automated External  
23 Defibrillators in Real Cardiac Arrests. *J Am Heart Assoc* 2017;**6**(3). doi:  
24 10.1161/jaha.116.004572
- 25 13. Elmqvist C, Brunt D, Fridlund B, et al. Being first on the scene of an accident--  
26 experiences of 'doing' prehospital emergency care. *Scand J Caring Sci*  
27 2010;**24**(2):266-73. doi: 10.1111/j.1471-6712.2009.00716.x
- 28 14. Davies E, Maybury B, Colquhoun M, et al. Public access defibrillation: psychological  
29 consequences in responders. *Resuscitation* 2008;**77**(2):201-6. doi:  
30 10.1016/j.resuscitation.2007.11.012
- 31 15. Flanagan JC. The critical incident technique. *Psychol Bull* 1954;**51**(4):327-58.
- 32 16. Krippendorff K. *Content analysis: An introduction to its methhოდology*. Thousands Oaks,  
33 Calif: SAGE Publications, 2013.
- 34 17. Lindstrom V, Bohm K, Kurland L. Prehospital care in Sweden. From a transport  
35 organization to advanced healthcare. *Notf Rett Med* 2015;**18**(2):107-09. doi:  
36 10.1007/s10049-015-1989-1
- 37 18. Perkins GD, Handley AJ, Koster RW, et al. European Resuscitation Council Guidelines  
38 for Resuscitation 2015: Section 2. Adult basic life support and automated external  
39 defibrillation. *Resuscitation* 2015;**95**:81-99. doi: 10.1016/j.resuscitation.2015.07.015
- 40 19. Schluter J, Seaton P, Chaboyer W. Critical incident technique: a user's guide for nurse  
41 researchers. *J Adv Nurs* 2008;**61**(1):107-14. doi: 10.1111/j.1365-2648.2007.04490.x
- 42 20. Patton MQ. *Qualitative research & evaluation methods: Integrating theory and practice*.  
43 Thousand Oaks, Calif: SAGE Publications, 2015.
- 44 21. Ek B, Svedlund M. Registered nurses' experiences of their decision-making at an  
45 Emergency Medical Dispatch Centre. *J Clin Nurs* 2015;**24**(7-8):1122-31. doi:  
46 10.1111/jocn.12701
- 47 22. Berdowski J, Beekhuis F, Zwinderman AH, et al. Importance of the first link: description  
48 and recognition of an out-of-hospital cardiac arrest in an emergency call. *Circulation*  
49 2009;**119**(15):2096-102. doi: 10.1161/circulationaha.108.768325
- 50  
51  
52  
53  
54  
55  
56  
57  
58  
59

- 1  
2  
3 1 23. Sundstrom BW, Dahlberg K. Being prepared for the unprepared: a phenomenology field  
4 2 study of Swedish prehospital care. *J Emerg Nurs* 2012;**38**(6):571-7. doi:  
5 3 10.1016/j.jen.2011.09.003  
6 4  
7 4 24. Larsson R, Engstrom A. Swedish ambulance nurses' experiences of nursing patients  
8 5 suffering cardiac arrest. *Int J Nurs Pract* 2013;**19**(2):197-205. doi: 10.1111/ijn.12057  
9 6  
10 7 25. Nordberg P, Hollenberg J, Rosenqvist M, et al. The implementation of a dual dispatch  
11 8 system in out-of-hospital cardiac arrest is associated with improved short and long  
12 9 term survival. *Eur Heart J Acute Cardiovasc Care* 2014;**3**(4):293-303. doi:  
13 10 10.1177/2048872614532415  
14 11  
15 11 26. Bandura A. Self-efficacy: toward a unifying theory of behavioral change. *Psychol Rev*  
16 12 1977;**84**(2):191-215.  
17 13 27. Lerner EB, Hinchey PR, Billittier AJt. A survey of first-responder firefighters' attitudes,  
18 14 opinions, and concerns about their automated external defibrillator program. *Prehosp*  
19 15 *Emerg Care* 2003;**7**(1):120-4.  
20 16 28. Woollard M, Whitfield R, Newcombe RG, et al. Optimal refresher training intervals for  
21 17 AED and CPR skills: a randomised controlled trial. *Resuscitation* 2006;**71**(2):237-47.  
22 18 doi: 10.1016/j.resuscitation.2006.04.005  
23 19 29. Greif R, Lockey AS, Conaghan P, et al. European Resuscitation Council Guidelines for  
24 20 Resuscitation 2015: Section 10. Education and implementation of resuscitation.  
25 21 *Resuscitation* 2015;**95**:288-301. doi: 10.1016/j.resuscitation.2015.07.032  
26 22 30. Conn SM, Butterfield LD. Coping with secondary traumatic stress by general duty police  
27 23 officers: Practical implications. *CJC-RCC* 2013;**47**(2):272-98.  
28 24 31. Levy-Gigi E, Richter-Levin G, Keri S. The hidden price of repeated traumatic exposure:  
29 25 different cognitive deficits in different first-responders. *Front Behav Neurosci*  
30 26 2014;**8**:281. doi: 10.3389/fnbeh.2014.00281  
31 27 32. Skeffington PM, Rees CS, Mazzucchelli T. Trauma exposure and post-traumatic stress  
32 28 disorder within fire and emergency services in Western Australia. *Aust J Psychol*  
33 29 2017;**69**(1):20-28. doi: 10.1111/ajpy.12120  
34 30 33. Swedish Civil Contingencies Agency. Gender equality in numbers 2017.  
35 31 (<https://www.msb.se/sv/Insats--beredskap/Jamstallldhet--mangfald/Jamstallldhet-i-siffror/>) Accessed 010419.  
36  
37  
38  
39  
40  
41  
42  
43  
44  
45  
46  
47  
48  
49  
50  
51  
52  
53  
54  
55  
56  
57  
58  
59  
60

Figure 1. Time sequences, Categories and Sub-categories

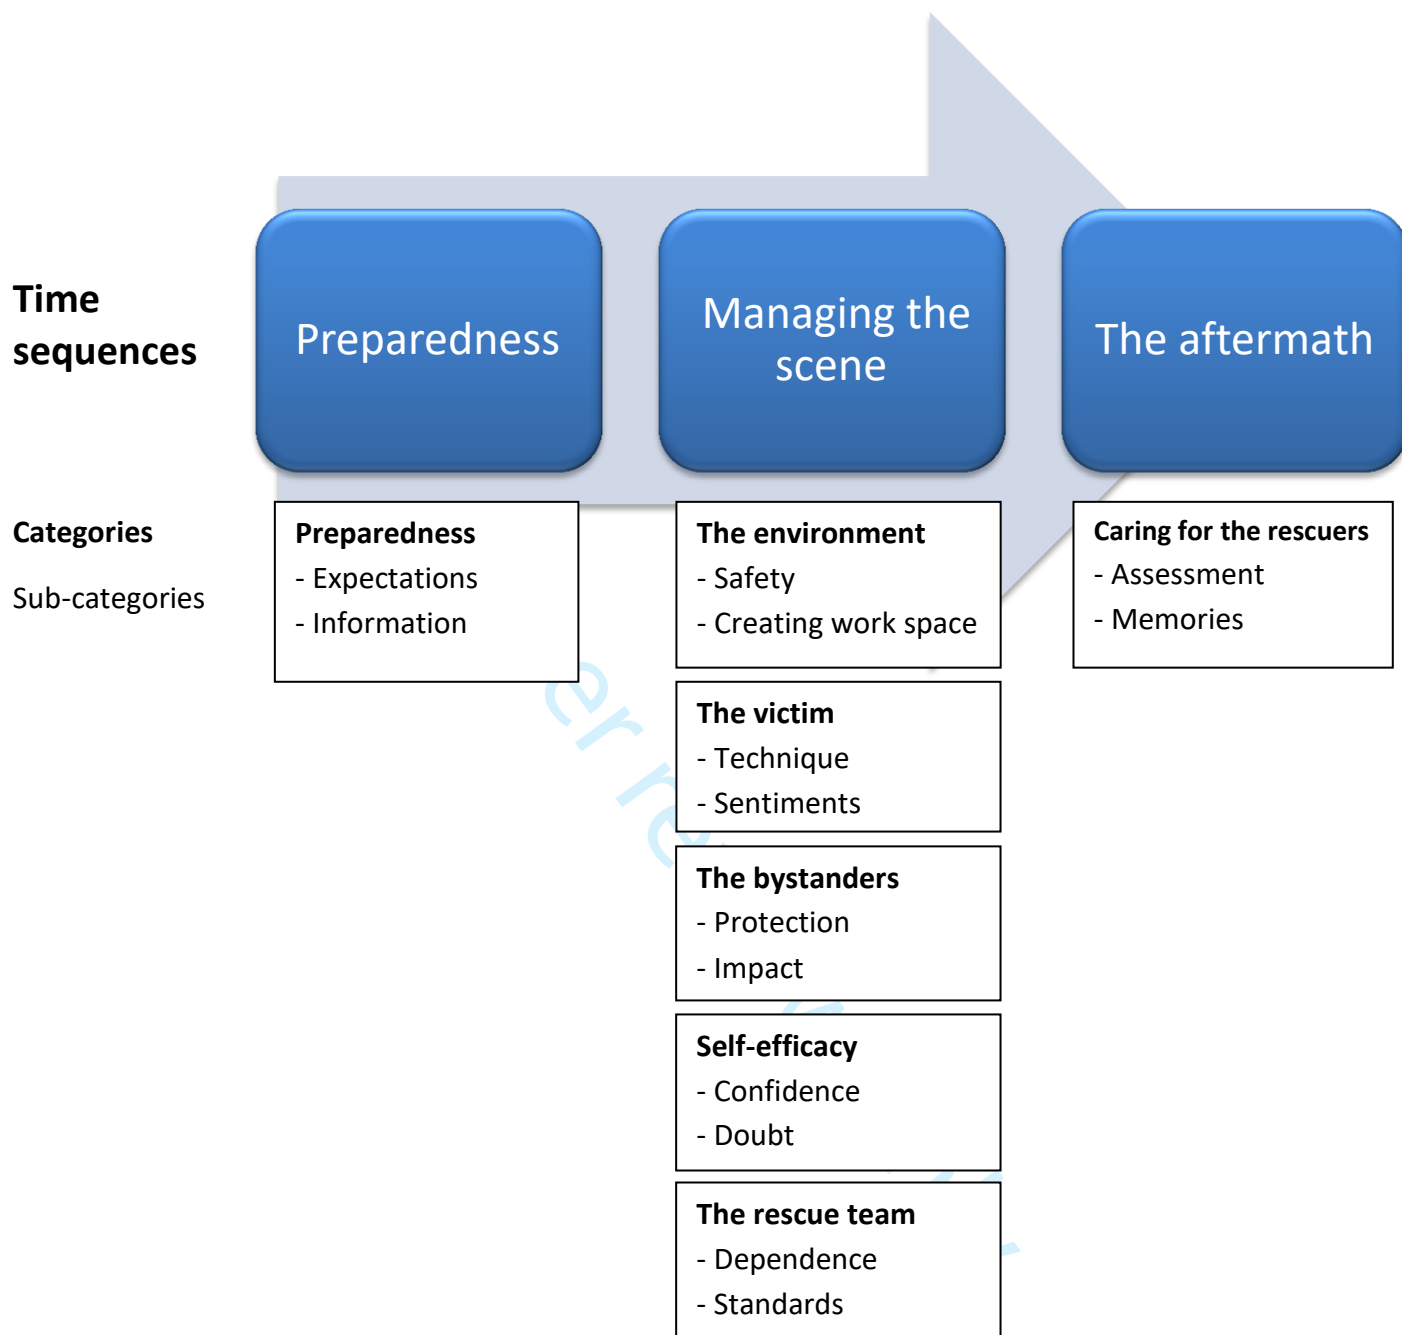

## COREQ (CONsolidated criteria for REporting Qualitative research) Checklist

A checklist of items that should be included in reports of qualitative research. You must report the page number in your manuscript where you consider each of the items listed in this checklist. If you have not included this information, either revise your manuscript accordingly before submitting or note N/A.

| Topic                                          | Item No. | Guide Questions/Description                                                                                                                              | Reported on Page No. |
|------------------------------------------------|----------|----------------------------------------------------------------------------------------------------------------------------------------------------------|----------------------|
| <b>Domain 1: Research team and reflexivity</b> |          |                                                                                                                                                          |                      |
| <i>Personal characteristics</i>                |          |                                                                                                                                                          |                      |
| Interviewer/facilitator                        | 1        | Which author/s conducted the interview or focus group?                                                                                                   |                      |
| Credentials                                    | 2        | What were the researcher's credentials? E.g. PhD, MD                                                                                                     |                      |
| Occupation                                     | 3        | What was their occupation at the time of the study?                                                                                                      |                      |
| Gender                                         | 4        | Was the researcher male or female?                                                                                                                       |                      |
| Experience and training                        | 5        | What experience or training did the researcher have?                                                                                                     |                      |
| <i>Relationship with participants</i>          |          |                                                                                                                                                          |                      |
| Relationship established                       | 6        | Was a relationship established prior to study commencement?                                                                                              |                      |
| Participant knowledge of the interviewer       | 7        | What did the participants know about the researcher? e.g. personal goals, reasons for doing the research                                                 |                      |
| Interviewer characteristics                    | 8        | What characteristics were reported about the interviewer/facilitator? e.g. Bias, assumptions, reasons and interests in the research topic                |                      |
| <b>Domain 2: Study design</b>                  |          |                                                                                                                                                          |                      |
| <i>Theoretical framework</i>                   |          |                                                                                                                                                          |                      |
| Methodological orientation and Theory          | 9        | What methodological orientation was stated to underpin the study? e.g. grounded theory, discourse analysis, ethnography, phenomenology, content analysis |                      |
| <i>Participant selection</i>                   |          |                                                                                                                                                          |                      |
| Sampling                                       | 10       | How were participants selected? e.g. purposive, convenience, consecutive, snowball                                                                       |                      |
| Method of approach                             | 11       | How were participants approached? e.g. face-to-face, telephone, mail, email                                                                              |                      |
| Sample size                                    | 12       | How many participants were in the study?                                                                                                                 |                      |
| Non-participation                              | 13       | How many people refused to participate or dropped out? Reasons?                                                                                          |                      |
| <i>Setting</i>                                 |          |                                                                                                                                                          |                      |
| Setting of data collection                     | 14       | Where was the data collected? e.g. home, clinic, workplace                                                                                               |                      |
| Presence of non-participants                   | 15       | Was anyone else present besides the participants and researchers?                                                                                        |                      |
| Description of sample                          | 16       | What are the important characteristics of the sample? e.g. demographic data, date                                                                        |                      |
| <i>Data collection</i>                         |          |                                                                                                                                                          |                      |
| Interview guide                                | 17       | Were questions, prompts, guides provided by the authors? Was it pilot tested?                                                                            |                      |
| Repeat interviews                              | 18       | Were repeat interviews carried out? If yes, how many?                                                                                                    |                      |
| Audio/visual recording                         | 19       | Did the research use audio or visual recording to collect the data?                                                                                      |                      |
| Field notes                                    | 20       | Were field notes made during and/or after the interview or focus group?                                                                                  |                      |
| Duration                                       | 21       | What was the duration of the interviews or focus group?                                                                                                  |                      |
| Data saturation                                | 22       | Was data saturation discussed?                                                                                                                           |                      |
| Transcripts returned                           | 23       | Were transcripts returned to participants for comment and/or                                                                                             |                      |

| Topic                                  | Item No. | Guide Questions/Description                                                                                                        | Reported on Page No. |
|----------------------------------------|----------|------------------------------------------------------------------------------------------------------------------------------------|----------------------|
|                                        |          | correction?                                                                                                                        |                      |
| <b>Domain 3: analysis and findings</b> |          |                                                                                                                                    |                      |
| <i>Data analysis</i>                   |          |                                                                                                                                    |                      |
| Number of data coders                  | 24       | How many data coders coded the data?                                                                                               |                      |
| Description of the coding tree         | 25       | Did authors provide a description of the coding tree?                                                                              |                      |
| Derivation of themes                   | 26       | Were themes identified in advance or derived from the data?                                                                        |                      |
| Software                               | 27       | What software, if applicable, was used to manage the data?                                                                         |                      |
| Participant checking                   | 28       | Did participants provide feedback on the findings?                                                                                 |                      |
| <i>Reporting</i>                       |          |                                                                                                                                    |                      |
| Quotations presented                   | 29       | Were participant quotations presented to illustrate the themes/findings?<br>Was each quotation identified? e.g. participant number |                      |
| Data and findings consistent           | 30       | Was there consistency between the data presented and the findings?                                                                 |                      |
| Clarity of major themes                | 31       | Were major themes clearly presented in the findings?                                                                               |                      |
| Clarity of minor themes                | 32       | Is there a description of diverse cases or discussion of minor themes?                                                             |                      |

Developed from: Tong A, Sainsbury P, Craig J. Consolidated criteria for reporting qualitative research (COREQ): a 32-item checklist for interviews and focus groups. *International Journal for Quality in Health Care*. 2007. Volume 19, Number 6: pp. 349 – 357

**Once you have completed this checklist, please save a copy and upload it as part of your submission. DO NOT include this checklist as part of the main manuscript document. It must be uploaded as a separate file.**

# BMJ Open

## Experiences among firefighters and police officers of responding to out-of-hospital cardiac arrest in a dual dispatch programme in Sweden: an interview study

|                                 |                                                                                                                                                                                                                                                                                                                                                                                                                                                                                 |
|---------------------------------|---------------------------------------------------------------------------------------------------------------------------------------------------------------------------------------------------------------------------------------------------------------------------------------------------------------------------------------------------------------------------------------------------------------------------------------------------------------------------------|
| Journal:                        | <i>BMJ Open</i>                                                                                                                                                                                                                                                                                                                                                                                                                                                                 |
| Manuscript ID                   | bmjopen-2019-030895.R2                                                                                                                                                                                                                                                                                                                                                                                                                                                          |
| Article Type:                   | Original research                                                                                                                                                                                                                                                                                                                                                                                                                                                               |
| Date Submitted by the Author:   | 03-Oct-2019                                                                                                                                                                                                                                                                                                                                                                                                                                                                     |
| Complete List of Authors:       | Hasselqvist-Ax, Ingela ; Karolinska institutet, Dept. of Cardiology, Centre for Resuscitation Science<br>Nordberg, Per; Karolinska institutet, Dept. of Cardiology, Centre for Resuscitation Science<br>Svensson, Leif; Karolinska Institute, Department of Medicine<br>Hollenberg, Jacob; Karolinska Institutet, Department of Medicine, Center for Resuscitation Science<br>Joelsson-Alm, Eva; Karolinska Institutet, Dept. of Clinical Science and Education, Södersjukhuset |
| <b>Primary Subject Heading</b>: | Qualitative research                                                                                                                                                                                                                                                                                                                                                                                                                                                            |
| Secondary Subject Heading:      | Emergency medicine                                                                                                                                                                                                                                                                                                                                                                                                                                                              |
| Keywords:                       | Cardiopulmonary Resuscitation, Critical Incident Technique, Firefighters, First Responders, Out-of-Hospital Cardiac Arrest, Police Officers                                                                                                                                                                                                                                                                                                                                     |
|                                 |                                                                                                                                                                                                                                                                                                                                                                                                                                                                                 |

SCHOLARONE™  
Manuscripts

1  
2  
3 **Experiences among firefighters and police officers of responding to out-of-**  
4 **hospital cardiac arrest in a dual dispatch programme in Sweden: an**  
5 **interview study**  
6  
7  
8  
9

10 Ingela Hasselqvist-Ax,<sup>1</sup> Per Nordberg,<sup>2</sup> Leif Svensson,<sup>2</sup> Jacob Hollenberg,<sup>2</sup> Eva Joelsson-  
11 Alm<sup>3</sup>  
12  
13  
14

15 <sup>1</sup>Ingela Hasselqvist-Ax, RN, PhD, Centre for Resuscitation Science, Department of Medicine,  
16 Solna, Karolinska Institutet, Swedish Resuscitation Council, Box 5182, SE-12118  
17 Johanneshov, Sweden. (ORCID 0000-0001-5081-6532)  
18  
19

20 <sup>2</sup>Per Nordberg, MD, PhD, Centre for Resuscitation Science, Department of Medicine, Solna,  
21 Karolinska Institutet and Section of Cardiology, South General Hospital, SE-118 83  
22 Stockholm, Sweden  
23  
24  
25  
26  
27  
28

29 <sup>2</sup>Leif Svensson, MD, PhD, Centre for Resuscitation Science, Department of Medicine, Solna,  
30 Karolinska Institutet, South General Hospital, SE-118 83 Stockholm, Sweden  
31  
32

33 <sup>2</sup>Jacob Hollenberg, MD, PhD, Centre for Resuscitation Science, Department of Medicine,  
34 Solna, Karolinska Institutet, Section of Cardiology, South General Hospital, SE-118 83  
35 Stockholm, Sweden  
36  
37  
38  
39

40 <sup>3</sup>Eva Joelsson-Alm, MSN, PhD, Department of Clinical Science and Education, Karolinska  
41 Institutet, Section of Anesthesiology and Intensive Care, South General Hospital, SE-118 83  
42 Stockholm, Sweden.  
43  
44  
45  
46  
47

48 Correspondence to

49 Ingela Hasselqvist-Ax

50 E-mail (1): [ingela.hasselqvist-ax@hlr.nu](mailto:ingela.hasselqvist-ax@hlr.nu)

51 E-mail (2): [ingela.hasselqvist-ax@ki.se](mailto:ingela.hasselqvist-ax@ki.se)

52 Abstract: 247

53 Article: 3347  
54  
55  
56  
57  
58  
59  
60

## Abstract

**Objectives** The objective of this study was to explore firefighters' and police officers' experiences of responding to out-of-hospital cardiac arrest in a dual dispatch programme.

**Design** A qualitative interview study with semi-structured, open-ended questions where Critical Incident Technique (CIT) was used to collect recalled cardiac arrest situations from the participants' narratives. The interviews were transcribed verbatim and analyzed with inductive content analysis.

**Setting** The County of Stockholm, Sweden.

**Participants** Police officers (n=10), and firefighters (n=12) participating in a dual dispatch programme with Emergency Medical Services in case of suspected out-of-hospital cardiac arrest of cardiac or non-cardiac origin.

**Results** Analysis of 60 critical incidents was performed resulting in three consecutive time sequences (Preparedness, Managing the scene, and The aftermath) with related categories, where first responders described the complexity of the cardiac arrest situation. Detailed information about the case and the location was crucial for the preparedness, and information deficits created stress, frustration and incorrect perceptions about the victim. The technical challenges of performing cardiopulmonary resuscitation and managing the airway, was prominent and the need of regular team training and education in first aid was highlighted.

**Conclusions** Participating in dual dispatch in case of suspected out-of-hospital cardiac arrest was described as a complex technical and emotional process by first responders. Providing case discussions and opportunities to give, and receive feedback about the case is a main task for the leadership in the organizations to diminish stress among personnel and to improve future OHCA missions.



### Strengths and limitations of this study

- Few other studies concerning first responders' experiences about participating in dual dispatch with Emergency Medical Services in out-of-hospital cardiac arrest have previously been published.
- The study provides new insights from first responders about the complex situation of out-of-hospital cardiac arrest.
- One limitation of the study is the risk of recall bias.
- Qualitative studies propose a deeper understanding of a phenomenon, but the results cannot be generalized to any other group of first responders or organizations. However new theories and fields of research can be developed from the results.

### Keywords

Cardiopulmonary Resuscitation; Critical Incident Technique; Firefighters; First responders; Out-of-Hospital Cardiac Arrest; Police officers

## 1 Introduction

2 To improve outcome in out-of-hospital cardiac arrest (OHCA) several prehospital measures  
3 have been introduced worldwide, e.g. different types of public access defibrillation programs<sup>1</sup>  
4 and implementation of dual dispatch systems including emergency medical services (EMS),  
5 firefighters and/or police officers i.e. first responders (FRs), trained in Basic Life Support  
6 (BLS) dispatched in case of suspected OHCA.<sup>2-5</sup> In the County of Stockholm, Sweden, a dual  
7 dispatch system involving EMS and firefighters was introduced in 2005.<sup>6</sup> Police officers were  
8 fully integrated in the OHCA alarm system in 2012.<sup>7</sup> Experiences of performing  
9 cardiopulmonary resuscitation (CPR) outside hospital are mostly explored within the  
10 bystander population.<sup>8-12</sup> Previous research in regards to FRs experiences of participating in  
11 emergency call-outs has been described in the context of traffic accidents<sup>13</sup> and  
12 psychological consequences about performing CPR and using an automated external  
13 defibrillator (AED).<sup>14</sup>

14 The aim of this interview study was to explore firefighters' and police officers' experiences of  
15 saving lives in OHCA in a dual dispatch programme.

## 16 Methods

### 17 Design

18 This was an interview study where data were analyzed by using Critical Incident Technique  
19 (CIT)<sup>15</sup> and inductive qualitative content analysis.<sup>16</sup> A "critical incident" (CI), in this study is  
20 a description of a cardiac arrest situation recalled as important by the participants. OHCA  
21 were included independent of etiology (medical or non-medical) and age of the victim.

### 22 Study setting and dispatch

23 The study was conducted in Stockholm County covering 6519 km<sup>2</sup> with 2.3 milj. inhabitants  
24 living in densely populated urban areas, as well as in more rural parts. In case of a suspected

1  
2  
3 1 OHCA the dispatchers at the Emergency Medical Communication Centre (EMCC) first  
4  
5 2 dispatches two ambulances staffed with specialist nurses and emergency medical technicians  
6  
7 3 performing advanced life support.<sup>17</sup> In special circumstances such as major trauma, drowning  
8  
9 4 and pediatric cardiac arrests, a physician-staffed rapid response vehicle is alerted. FRs trained  
10  
11 5 in BLS, and equipped with AEDs are also dispatched, primarily the fire fighters and thereafter  
12  
13 6 the police<sup>18</sup> The EMS, police force, and fire department are alerted by the common  
14  
15 7 emergency number (112). In Stockholm County there are 40 fire stations and 30 police  
16  
17 8 stations. Depending on time of day and type of vehicles being dispatched, the number of  
18  
19 9 attending staff varies between four and ten in average. The police are considered to be an  
20  
21 10 extra resource in OHCA, and cannot always engage depending on other ongoing missions.  
22  
23 11 Approximately 1200 confirmed OHCA occurs annually, and FRs are being dispatched in  
24  
25 12 estimated 70% of these cases.

### 13 **CPR training amongst FRs**

14  
15 15 Annual adult and pediatric BLS training is recommended for FRs by European guidelines in  
16  
17 16 CPR<sup>18</sup> and the Swedish Resuscitation Council. However compliance to these  
18  
19 17 recommendations could differ between participating organizations. It is mandatory for FRs to  
20  
21 18 start CPR if first on scene unless obvious signs of death are present.

### 19 **Participants**

20  
21 21 Eligible participants were firefighters and police officers with experiences of being dispatched  
22  
23 22 as first responders in OHCA. The recommended sample size in CIT depends on what activity  
24  
25 23 or behavior being studied. If the activity is relatively well-defined, a total number of 50 to 100  
26  
27 24 critical incidents (CIs) are needed for the analysis.<sup>15 19</sup> With an estimate of 2-4 CIs per  
28  
29 25 interview, a sample size of approximately 20 interviews was considered sufficient.

## 1 Data collection

2 The strategy used was a purposive sampling of key participants with knowledge from one or  
3 more cardiac arrest situations, with the main focus to collect as rich descriptions as possible.<sup>20</sup>

4 To obtain a variety of workplaces, different ages and gender three approaches for recruitment  
5 were used; 1) An invitation letter from the researchers was presented to the main

6 collaboration group for OHCA alarms in Stockholm County. 2) On the police report for

7 cardiac arrest alarms there was a request to contact the researchers for a voluntary interview.

8 3) Fire stations were directly contacted for recruitment of participants. All three approaches  
9 were used, and all voluntary participants who fulfilled the inclusion criteria were included.

10 The final study sample consisted of 22 participants; 12 firefighters representing four different

11 fire brigades, and 10 police officers from eight police stations throughout the County. The

12 participants received written information about the study and contact information to the

13 researchers before the interviews took place. An interview guide with open-ended semi-

14 structured questions was used (Table 1).

15 Table 1. Interview guide for collecting Critical Incidents

|                                                                                                                                                                                                                             |
|-----------------------------------------------------------------------------------------------------------------------------------------------------------------------------------------------------------------------------|
| 1. Can you describe a particular situation and the circumstances surrounding it when you have been dispatched to a person suffering from an out-of-hospital cardiac arrest? Please describe the circumstances and the time. |
| 2. Can you describe how you acted in this situation?                                                                                                                                                                        |
| 3. Can you describe how other persons acted in this situation?                                                                                                                                                              |
| 4. Can you describe how you reacted?                                                                                                                                                                                        |
| 5. What was the result of the situation?                                                                                                                                                                                    |
| 6. Do you want to add something more?                                                                                                                                                                                       |

16

1  
2  
3 1 Data of demographic character were also collected. The participants could choose the place  
4  
5 2 for the interview, and all except three took place at their regular workplaces. The interviews  
6  
7 3 lasted between 9 to 38 minutes (22 minutes in median), and were all conducted by the first  
8  
9 4 author (IHA), a nurse anesthetist and teacher with professional knowledge in OHCA research,  
10  
11 5 especially CPR/defibrillation and dual dispatch. The interviews were recorded with a digital  
12  
13 6 voice recorder (Olympus™ VN-7800PC), and transcribed verbatim by a secretary with  
14  
15 7 knowledge of cardiac arrest research. A pilot interview to test the questions in the interview  
16  
17 8 guide was performed in February 2015. No change of questions was needed. The pilot  
18  
19 9 interview contained rich material with descriptions from three CIs, and were therefore  
20  
21 10 included in the final analysis. The following interviews were carried out June 16<sup>th</sup> to  
22  
23 11 December 13<sup>th</sup> 2016.

## 12 **Data analysis**

13  
14 The analysis was performed as follows: 1) Identification of CIs as the unit of analysis in each  
15  
16 15 interview. The CIs were thereafter read repeatedly to gain a comprehensive view of the  
17  
18 16 whole. 2) Condensation of each CI into meaning units with the purpose to reduce the text and  
19  
20 17 preserve the core in the narrative. A meaning unit is close to the text and is not interpreted by  
21  
22 18 the researchers at this stage. 3) Interpretation and coding the meaning units into sub-  
23  
24 19 categories by the authors. 4) The sub-categories were thereafter merged into categories from  
25  
26 20 which time sequences were created (Table 2).

1 Table 2. Description of the analysis process

| Critical Incident (CI)                                                                                                                                                     | Condensed meaning units                                                                 | Sub-category | Category        | Time sequence      |
|----------------------------------------------------------------------------------------------------------------------------------------------------------------------------|-----------------------------------------------------------------------------------------|--------------|-----------------|--------------------|
| There was some sort of crack house; a younger girl had a cardiac arrest. // And then you think before going in, there is a second type of threat scenario when entering... | Crack house<br>Younger girl<br>Cardiac arrest<br>Think before going in<br>Second threat | Safety       | The environment | Managing the scene |

2 Excerpt from Critical Incident #1, (Firefighter #1)

3  
4 To ensure rigor and consistency of interpretation, the analysis was discussed by the  
5 researchers, and agreement was reached at every step after dialogue between the co-  
6 researchers, to ensure that all analyses were supported by the data. In the analysis, the  
7 participants were anonymized for the researchers.

### 8 **Ethical considerations**

9  
10 Written informed consent was obtained from the participants and information was given about  
11 the possibility to withdraw from the study without any reprisal. Participants were not entitled  
12 to financial remuneration or other benefits. The study was approved by the Regional Ethics  
13 Review Board in Stockholm, Sweden (registration number 2015/1091- 31/5).

### 14 **Patient and Public Involvement**

15 The patients and the public were not involved in planning or the design of this study.

## 17 **Results**

18  
19 Baseline characteristics are presented in Table 3. Median age was 36 years and the working  
20 experience as firefighter and police officer were 6.5 years in median for both professions.

1 Firefighters were predominantly men, and they had longer experience of being dispatched to  
 2 an OHCA than the participating police officers.

3 Table 3. Characteristics of participants (N=22)

| F/P<br>55/45<br>% | Age<br>(y)<br>Mean<br>=36 | Sex<br>M/F<br>77/23<br>% | Prof<br>exp.<br>(y)<br>Mean=<br>7.5 | No of<br>CA | Years in<br>OHCA<br>dispatch | Latest<br>CPR<br>course<br>(y)<br>Mean<br>=1 | CPR<br>level | CC<br>Yes/<br>No<br>100/0<br>% | Vent.<br>Yes/<br>No<br>73/27<br>% | Defibr.*<br>Yes/No<br>77/23<br>% | Health-<br>care edu.†<br>Yes/No<br>45/55<br>% |
|-------------------|---------------------------|--------------------------|-------------------------------------|-------------|------------------------------|----------------------------------------------|--------------|--------------------------------|-----------------------------------|----------------------------------|-----------------------------------------------|
| F1                | 23                        | M                        | 3.5                                 | 11-20       | 0-3                          | 1                                            | PLS/ILS      | Yes                            | Yes                               | Yes                              | Yes                                           |
| F2                | 47                        | M                        | 9.5                                 | >20         | 8-10                         | 1                                            | PLS          | Yes                            | Yes                               | Yes                              | Yes                                           |
| F3                | 26                        | M                        | 3.5                                 | 11-20       | 0-3                          | 1                                            | PLS/ILS      | Yes                            | Yes                               | Yes                              | No                                            |
| F4                | 43                        | M                        | 5                                   | >20         | 4-7                          | 1                                            | PLS/ILS      | Yes                            | Yes                               | Yes                              | Yes                                           |
| F5                | 50                        | M                        | 27                                  | >20         | 8-10                         | 1                                            | BLS          | Yes                            | Yes                               | Yes                              | No                                            |
| F6                | 54                        | M                        | 11                                  | >20         | 8-10                         | 1                                            | BLS          | Yes                            | Yes                               | Yes                              | Yes                                           |
| F7                | 43                        | M                        | 10                                  | >20         | 8-10                         | 1                                            | BLS          | Yes                            | Yes                               | Yes                              | No                                            |
| F8                | 28                        | M                        | 7                                   | 0-5         | 0-3                          | 1                                            | ILS          | Yes                            | Yes                               | No                               | Yes                                           |
| F9                | 35                        | M                        | 2                                   | 11-20       | 0-3                          | 1                                            | ILS          | Yes                            | Yes                               | Yes                              | No                                            |
| F10               | 36                        | M                        | 11                                  | >20         | 8-10                         | 1                                            | PLS          | Yes                            | Yes                               | Yes                              | No                                            |
| F11               | 27                        | F                        | 6                                   | >20         | 4-7                          | 1                                            | ILS          | Yes                            | Yes                               | Yes                              | No                                            |
| F12               | 28                        | M                        | 5                                   | 6-10        | 4-7                          | 1                                            | ILS          | Yes                            | Yes                               | Yes                              | Yes                                           |
| P1                | 40                        | M                        | 7                                   | >20         | 4-7                          | >2                                           | ILS          | Yes                            | No                                | Yes                              | No                                            |
| P2                | 31                        | F                        | 3                                   | 0-5         | 0-3                          | 1                                            | ILS          | Yes                            | No                                | No                               | Yes                                           |
| P3                | 30                        | M                        | 2                                   | 6-10        | 0-3                          | 1                                            | BLS          | Yes                            | Yes                               | Yes                              | No                                            |
| P4                | 43                        | M                        | 13                                  | >20         | 4-7                          | 1-2                                          | ILS          | Yes                            | No                                | No                               | Yes                                           |
| P5                | 26                        | M                        | 2                                   | 0-5         | 0-3                          | 1-2                                          | BLS          | Yes                            | No                                | Yes                              | Yes                                           |
| P6                | 38                        | F                        | 10                                  | 6-10        | 8-10                         | 1                                            | ILS          | Yes                            | Yes                               | Yes                              | No                                            |
| P7                | 28                        | F                        | 2.5                                 | 11-20       | 0-3                          | 1-2                                          | ILS          | Yes                            | No                                | No                               | No                                            |
| P8                | 33                        | M                        | 6                                   | 0-5         | 4-7                          | 1                                            | BLS          | Yes                            | Yes                               | Yes                              | No                                            |
| P9                | 40                        | M                        | 9                                   | 0-5         | 0-3                          | 1                                            | BLS          | Yes                            | Yes                               | Yes                              | No                                            |
| P10               | 41                        | F                        | 9                                   | 6-10        | 0-3                          | >2                                           | ILS          | Yes                            | No                                | No                               | Yes                                           |

4 F/P:firefighter/police officer; M/F:male/female; CA:cardiac arrest; CPR:cardiopulmonary resuscitation;  
 5 PLS/ILS/BLS; pediatric life support/immediate life support/basic life support; CC:chest compressions;  
 6 Defibr:defibrillation  
 7 \*Automated External Defibrillator applied and electric chock administered.  
 8 † Healthcare education besides regular professional training as firefighter/police officer.

9  
 10 The total number of CIs were 60, varying from one to five per participant. Police officers  
 11 described in median three CIs, compared to two for the firefighters. During the analysis seven  
 12 categories and 14 sub-categories emerged which reflects three major time sequences  
 13 describing the temporal continuity of the OHCA situation: 1) Preparedness, 2) Managing the  
 14 scene, 3) The aftermath (Figure 1). They are presented with suitable citations to highlight

1 important aspects of each time sequence. The firefighters are referred to as “F” and the police  
2 officers as “P”.

### 3 **Preparedness**

4 This time sequence comprises the response time, which is defined as from incoming  
5 emergency call received at the EMCC, to arrival of FRs at the scene.

### 6 **Information**

7 Information deficit about the case was described as a considerable problem and caused stress  
8 and frustration amongst FRs. Especially when not finding the address, entry code to the  
9 building, or when there was no bystanders present showing the way.

10 *“We were trying to find the address; we were on the right street but we couldn’t find the right  
11 number....//...We started to feel frustration building up: Damn! We can’t find it.” (F10)*

### 12 **Expectations**

13 Expectations were grounded in the participants’ previous experiences and mental pictures of  
14 what was expected to happen. If the victim’s characteristic was not communicated by the  
15 EMCC, both firefighters and police officers described that they had a preconceived perception  
16 of the victim as an older person. Valuable time for both technical and mental preparations  
17 could then be delayed if the victim proved to be a child or a young adult.

### 18 **Managing the scene**

19 The time sequence was defined as from when the FRs vehicle stops at the address, to  
20 departing from the location.

### 21 **The environment**

22  
23 To be able to start CPR the FRs had to take control over the environment. Threats from  
24 bystanders and traffic caused anxiety, especially if there were few FRs in place from the



1  
2  
3 1 beginning and they had to focus mainly on the victim, instead of prioritizing their own safety  
4  
5 2 first.

6  
7  
8 3 *“So there we were in the middle of the motorway doing compressions, we were like, just right*  
9  
10 4 *there, in the middle of the road, doing compressions.”* (F10)

11  
12  
13  
14 5 Obstacles had to be taken care of, i.e. extraction from vehicles, removing furniture, or placing  
15  
16 6 the victim in supine position to be able to start resuscitation.

17  
18  
19 7 **The victim**

20 8  
21 9 The victim could be described in both a technical and emotional way as heavy, still warm, or  
22  
23  
24 10 disgusting to take care of when regurgitation had occurred. Performing manual chest  
25  
26 11 compressions was recounted by FRs as a repulsive task depending on flail chest caused by the  
27  
28 12 resuscitation.

29  
30  
31  
32 13 *“What I often think about is that when you do compressions, ribs get broken and I think that is*  
33  
34 14 *so horrible. That’s really the thing that affects me the most, whenever I do compressions or*  
35  
36 15 *when I think about cardiac arrest alarms.”* (F6)

37  
38  
39 16 When futile to resuscitate the victim, FRs often described the situation as sad or  
40  
41  
42 17 disappointing, especially when young people died in accidents or drug abuse. The mental  
43  
44 18 strain could be considerable if the FRs children were at similar age as the deceased.

45  
46 19 *“It was a young girl. It just feels so damned awful and you know when you’ve got two girls of*  
47  
48 20 *your own as well, it just feels awful....//...they had taken cocaine, amphetamine...//* (F5)

49  
50  
51  
52 21 Managing the airway was specified to be the most difficult technical skill, especially among  
53  
54 22 the police officers. This is also shown in Table 3 where six (60%) of the police officers used  
55  
56 23 compressions-only technique when resuscitating.

## 1 **The bystanders**

2 Comforting and taking care of bystanders was an extensive part of the assignment and many  
3 of the FRs expressed how laborious this task could be. Lack of education in handling  
4 emotional crisis after a cardiac arrest was emphasized. There were also no clear instructions  
5 where the FRs responsibility ended when the EMS had left. To leave an elderly person alone  
6 afterwards when the spouse had passed away was expressed as difficult.

7 *“I think we stayed there for almost an hour after the ambulance had left...//...She had some*  
8 *problems walking, this old lady. So we put lots of bottles of juice and stuff by the armchair*  
9 *where she used to sit so she wouldn't have to walk about and fetch things, because that was*  
10 *what her husband had done for her, before he had his cardiac arrest. (F12)*

11 Although protective towards the bystanders, FRs could also be critical. Especially personnel  
12 in elderly care facilities were described as passive and not knowing how to act in OHCA  
13 situations.

## 14 **Self-efficacy**

15 The FRs were moving between confidence and doubt when talking about their own capacity  
16 in the OHCA situation. A circumstance mentioned was when the case was not a cardiac arrest  
17 but some other illness. To make medical decisions before arrival of EMS without appropriate  
18 training in first aid was described as extremely difficult and stressful, especially for the police  
19 officers.

20 *“I don't have any medical training; I could see that half of the brain was out, maybe it works*  
21 *anyway, I don't have enough knowledge to decide.” (P5)*

22 The FRs could describe fear of doing more harm than good, but also satisfaction with their  
23 own work, knowing that they had played a significant role for the outcome.

24

## 1           2           3           4           5           6           7           8           9           10           11           12           13           14           15           16           17           18           19           20           21           22           23           24           25           26           27           28           29           30           31           32           33           34           35           36           37           38           39           40           41           42           43           44           45           46           47           48           49           50           51           52           53           54           55           56           57           58           59           60

### 1   **The rescue team**

2   Pronounced feelings of togetherness and dependence were noticeable, and the FRs trusted  
3   each other's ability to manage critical situations. Protocols for handling OHCA situations,  
4   especially among the firefighters, were expressed as "*our guiding star*" (F9), and they could  
5   also describe a clear structure for teamwork. This was not marked among the police officers  
6   who could feel loneliness and insufficiency if first in place, especially in more difficult  
7   OHCA cases.

### 8   **The aftermath**

9   The aftermath was the time period from when the FRs left the scene, and as long as vivid  
10  memories of the cardiac arrest were recalled and could be recounted by the participants.

### 12  **Caring for the rescuers**

13  **After tough assignments bodily symptoms, spinning thoughts and imprinted memories**  
14  **were reported in terms of "*never forgetting*" (P2), and "*stuck in my head*". (P5)**

16  *//... "and I just have to pass by the place, I don't think there has ever been a time when I*  
17  *haven't thought about it, I mean, every time I walk past or drive past this place, I think about*  
18  *this." ...// (P6)*

19  Assessment and defusing afterwards occurred more often among equal colleagues rather than  
20  meetings initiated by superior officers. Inputs from others about the case and own  
21  performance were considered positive and could ease the pressure, but several FRs called for  
22  a more pronounced responsibility from the heads of the department. The participants  
23  expressed that occupational stress could be avoided if stress management took place regularly.  
24  Repression was a strategy for coping by some FRs, others thought this could cause long term  
25  impairment of the ability to feel empathy. A positive experience afterwards was if the

1 survivor came to visit the FRs at the fire- or police station. The survivors were seen as  
2 reminders of success.

### 3 **Discussion**

4  
5 The aim of this interview study was to explore FRs experiences of participating in a dual  
6 dispatch programme in case of suspected OHCA. Our analysis of recounted critical incidents  
7 revealed three distinct time sequences regarding the cardiac arrest event described by the  
8 participants (Figure 1). Our main findings in each time sequence were: 1) Lack of information  
9 from EMCC about the victim caused frustration amongst FRs. 2) Perceived uncertainty in  
10 performing CPR, especially concerning rescue breaths. To handle psychological reactions  
11 amongst bystanders after an OHCA could be overwhelming. 3) FRs were missing discussion  
12 after mission with participating colleagues and superior officers, especially after tough cases.  
13 Information deficit from EMCC was a main concern for the FRs. However, information could  
14 be missing for the dispatchers in time for call-out due to language barriers or difficulties  
15 detecting if it is a true cardiac arrest or not.<sup>21 22</sup> EMS personnel have previously described  
16 similar concerns regarding dispatch.<sup>23</sup>  
17 Uncertainty could emerge if it was not an OHCA, but seizures or intoxication for example.  
18 Both firefighters and police officers therefore expressed a need of more thorough education in  
19 first aid. Regular training and education is also a matter of concern in EMS organizations  
20 taking care of OHCA victims.<sup>24</sup> Handling the airway appears to be a subject for improvement  
21 as reported earlier.<sup>14</sup> The ERC guidelines recommend that all rescuers trained and able to  
22 perform CPR should combine chest compressions and rescue breaths.<sup>18</sup> However, only five  
23 (50%) of the police officers had undergone annual training in CPR, and they expressed that  
24 chest compression-only technique was preferred as an easier way of managing the situation  
25 (Table 3). The police force in Stockholm County joined the dual dispatch programme later

1 compared to the firefighters, therefore the police officers have less experience in participating  
2 in cardiac arrest alarms.<sup>25</sup> In the interviews the police officers expressed more doubts about  
3 their self-efficacy<sup>26</sup> than the firefighters, especially concerning technical skills. To attach  
4 defibrillation pads and deliver countershocks was not much discussed by the police officers.  
5 This could be a consequence of the police being last summoned in OHCA alarms due to  
6 technicalities in the dispatch system. Other personnel prior to the police patrol have often  
7 already started treatment. In comparison, 686 firefighters in a survey, 24% had never applied  
8 an AED and 3% felt very uncomfortable doing so.<sup>27</sup> Application rates and retention could  
9 improve if FRs underwent frequent targeted hands-on AED training.<sup>28 29</sup> Stressful cardiac  
10 arrest situations were described in detail, despite a lapse of several months or years since the  
11 events. Adverse psychological effects after long-term exposure of traumatic events such as  
12 stress, anxiety, depression and posttraumatic stress disorder has been reported amongst  
13 FRs.<sup>30-32</sup> Several of the FRs discussed the need to ventilate the case among colleagues, and  
14 also the absence of organized case discussions after the mission.

15 A limitation of the study was that all participants worked in the most densely populated  
16 County in Sweden with high access to prehospital resources. Including FRs from other parts  
17 of the country would probably have generated other experiences, especially in low density  
18 populated areas where there are few rescuers available. Only one of the firefighters was  
19 female, which could have affected the results. The uneven gender distribution reflects the fact  
20 that only 5.5% of all firefighters in Sweden are women.<sup>33</sup> The police officers had a more  
21 evenly gender distribution.

22 Selecting volunteers for interviews could have introduced bias in terms of a non-  
23 representative sample. Different fire- and police stations around the County were thus chosen,  
24 as well as gender and varying ages among participants to obtain as rich information as  
25 possible about the research subject. There is always a risk of recall bias in interview studies,

1 especially if the incident took place months or years ago. All participants had however very  
2 clear memories of the recounted OHCA situations, and could describe them in detail.  
3 In a qualitative study generalization is not possible; instead the concept of trustworthiness is  
4 highlighted. Credibility was obtained by peer debriefing of all steps in the analysis (EJA, PN).  
5 The interviews were all conducted by the first author (IHA), which increased the likelihood  
6 they were performed in the same way. The participants were recruited through different  
7 approaches to reflect a representative sample of first responders in the County, thus increasing  
8 the transferability. Moreover, the research group has experiences in cardiology, out-of-  
9 hospital cardiac arrest, dual dispatch (PN, LS, JH), and other domains such as intensive care  
10 and qualitative studies (EJA). This strengthens the results, but also raises questions about  
11 reflexivity and bias, which were discussed during the whole process of collecting and  
12 interpreting data.

### 13 **Conclusion**

14  
15 Participating in dual dispatch in case of a suspected OHCA was often described as a complex  
16 process by first responders. Detailed information about the case and the location was crucial  
17 for the preparedness, and information deficits caused stress and incorrect perceptions about  
18 the victim. Technical challenges of performing CPR and managing the airway was prominent.  
19 The need of regular team training and education in first aid was requested as well as  
20 knowledge about psychological reactions amongst bystanders after an OHCA. Providing case  
21 discussions and opportunities to give and receive feedback about the case is a main task for  
22 the leadership in the first responder organizations.

23

24

## 1 Contributors

2 The study was designed by IHA and EJA. IHA recruited the participants and collected the  
3 data under the supervision of EJA. IHA, EJA and PN made substantial contributions to the  
4 analysis and interpretation of data. IHA drafted the manuscript. EJA, PN, LS and JH critically  
5 reviewed and revised the manuscript. All authors approved the final version of the manuscript  
6 for publication.

## 8 Data availability

9 Data can be made available upon request to the corresponding author.

## 10 Conflicts of Interest

11 None.

## 12 Acknowledgements

14 We wish to thank all participating firefighters and police officers.

## 15 Funding

16 Financial support has been granted from The Laerdal Foundation in Norway, the Swedish  
17 Heart–Lung Foundation and Stig Holmberg Scholarship.

## 18 References

- 19 1. Baekgaard JS, Viereck S, Moller TP, et al. The Effects of Public Access Defibrillation on  
20 Survival After Out-of-Hospital Cardiac Arrest: A Systematic Review of Observational  
21 Studies. *Circulation* 2017;**136**(10):954-65. doi: 10.1161/circulationaha.117.029067
- 22 2. Myerburg RJ, Fenster J, Velez M, et al. Impact of community-wide police car deployment  
23 of automated external defibrillators on survival from out-of-hospital cardiac arrest.  
24 *Circulation* 2002;**106**(9):1058-64.
- 25 3. Hawkins SC, Shapiro AH, Sever AE, et al. The role of law enforcement agencies in out-of-  
26 hospital emergency care. *Resuscitation* 2007;**72**(3):386-93. doi:  
27 10.1016/j.resuscitation.2006.07.021
- 28 4. Hansen CM, Kragholm K, Granger CB, et al. The role of bystanders, first responders, and  
29 emergency medical service providers in timely defibrillation and related outcomes  
30 after out-of-hospital cardiac arrest: Results from a statewide registry. *Resuscitation*  
31 2015;**96**:303-9. doi: 10.1016/j.resuscitation.2015.09.002



- 1 5. Becker L, Husain S, Kudenchuk P, et al. Treatment of cardiac arrest with rapid  
2 defibrillation by police in King County, Washington. *Prehosp Emerg Care*  
3 2014;**18**(1):22-7. doi: 10.3109/10903127.2013.825353
- 4 6. Hollenberg J, Riva G, Bohm K, et al. Dual dispatch early defibrillation in out-of-hospital  
5 cardiac arrest: the SALSA-pilot. *Eur Heart J* 2009;**30**(14):1781-9. doi:  
6 10.1093/eurheartj/ehp177
- 7 7. Nordberg P, Jonsson M, Forsberg S, et al. The survival benefit of dual dispatch of EMS and  
8 fire-fighters in out-of-hospital cardiac arrest may differ depending on population  
9 density-a prospective cohort study. *Resuscitation* 2015;**90**:143-9. doi:  
10 10.1016/j.resuscitation.2015.02.036
- 11 8. Axelsson A, Herlitz J, Fridlund B. How bystanders perceive their cardiopulmonary  
12 resuscitation intervention; a qualitative study. *Resuscitation* 2000;**47**(1):71-81.
- 13 9. Weslien M, Nilstun T, Lundqvist A, et al. When the unreal becomes real: family members'  
14 experiences of cardiac arrest. *Nurs Crit Care* 2005;**10**(1):15-22.
- 15 10. Ann-Britt T, Ella D, Johan H, et al. Spouses' experiences of a cardiac arrest at home: an  
16 interview study. *Eur J Cardiovasc Nurs* 2010;**9**(3):161-7. doi:  
17 10.1016/j.ejcnurse.2009.12.005
- 18 11. Moller TP, Hansen CM, Fjordholt M, et al. Debriefing bystanders of out-of-hospital  
19 cardiac arrest is valuable. *Resuscitation* 2014;**85**(11):1504-11 doi:  
20 10.1016/j.resuscitation.2014.08.006
- 21 12. Malta Hansen C, Rosenkranz SM, Folke F, et al. Lay Bystanders' Perspectives on What  
22 Facilitates Cardiopulmonary Resuscitation and Use of Automated External  
23 Defibrillators in Real Cardiac Arrests. *J Am Heart Assoc* 2017;**6**(3). doi:  
24 10.1161/jaha.116.004572
- 25 13. Elmqvist C, Brunt D, Fridlund B, et al. Being first on the scene of an accident--  
26 experiences of 'doing' prehospital emergency care. *Scand J Caring Sci*  
27 2010;**24**(2):266-73. doi: 10.1111/j.1471-6712.2009.00716.x
- 28 14. Davies E, Maybury B, Colquhoun M, et al. Public access defibrillation: psychological  
29 consequences in responders. *Resuscitation* 2008;**77**(2):201-6. doi:  
30 10.1016/j.resuscitation.2007.11.012
- 31 15. Flanagan JC. The critical incident technique. *Psychol Bull* 1954;**51**(4):327-58.
- 32 16. Krippendorff K. *Content analysis: An introduction to its methhოდology*. Thousands Oaks,  
33 Calif: SAGE Publications, 2013.
- 34 17. Lindstrom V, Bohm K, Kurland L. Prehospital care in Sweden. From a transport  
35 organization to advanced healthcare. *Notf Rett Med* 2015;**18**(2):107-09. doi:  
36 10.1007/s10049-015-1989-1
- 37 18. Perkins GD, Handley AJ, Koster RW, et al. European Resuscitation Council Guidelines  
38 for Resuscitation 2015: Section 2. Adult basic life support and automated external  
39 defibrillation. *Resuscitation* 2015;**95**:81-99. doi: 10.1016/j.resuscitation.2015.07.015
- 40 19. Schluter J, Seaton P, Chaboyer W. Critical incident technique: a user's guide for nurse  
41 researchers. *J Adv Nurs* 2008;**61**(1):107-14. doi: 10.1111/j.1365-2648.2007.04490.x
- 42 20. Patton MQ. *Qualitative research & evaluation methods: Integrating theory and practice*.  
43 Thousand Oaks, Calif: SAGE Publications, 2015.
- 44 21. Ek B, Svedlund M. Registered nurses' experiences of their decision-making at an  
45 Emergency Medical Dispatch Centre. *J Clin Nurs* 2015;**24**(7-8):1122-31. doi:  
46 10.1111/jocn.12701
- 47 22. Berdowski J, Beekhuis F, Zwinderman AH, et al. Importance of the first link: description  
48 and recognition of an out-of-hospital cardiac arrest in an emergency call. *Circulation*  
49 2009;**119**(15):2096-102. doi: 10.1161/circulationaha.108.768325
- 50  
51  
52  
53  
54  
55  
56  
57  
58  
59



- 1  
2  
3 1 23. Sundstrom BW, Dahlberg K. Being prepared for the unprepared: a phenomenology field  
4 2 study of Swedish prehospital care. *J Emerg Nurs* 2012;**38**(6):571-7. doi:  
5 3 10.1016/j.jen.2011.09.003  
6 4  
7 4 24. Larsson R, Engstrom A. Swedish ambulance nurses' experiences of nursing patients  
8 5 suffering cardiac arrest. *Int J Nurs Pract* 2013;**19**(2):197-205. doi: 10.1111/ijn.12057  
9 6  
10 7 25. Nordberg P, Hollenberg J, Rosenqvist M, et al. The implementation of a dual dispatch  
11 8 system in out-of-hospital cardiac arrest is associated with improved short and long  
12 9 term survival. *Eur Heart J Acute Cardiovasc Care* 2014;**3**(4):293-303. doi:  
13 10 10.1177/2048872614532415  
14 11  
15 11 26. Bandura A. Self-efficacy: toward a unifying theory of behavioral change. *Psychol Rev*  
16 12 1977;**84**(2):191-215.  
17 13 27. Lerner EB, Hinchey PR, Billittier AJt. A survey of first-responder firefighters' attitudes,  
18 14 opinions, and concerns about their automated external defibrillator program. *Prehosp*  
19 15 *Emerg Care* 2003;**7**(1):120-4.  
20 16 28. Woollard M, Whitfield R, Newcombe RG, et al. Optimal refresher training intervals for  
21 17 AED and CPR skills: a randomised controlled trial. *Resuscitation* 2006;**71**(2):237-47.  
22 18 doi: 10.1016/j.resuscitation.2006.04.005  
23 19 29. Greif R, Lockey AS, Conaghan P, et al. European Resuscitation Council Guidelines for  
24 20 Resuscitation 2015: Section 10. Education and implementation of resuscitation.  
25 21 *Resuscitation* 2015;**95**:288-301. doi: 10.1016/j.resuscitation.2015.07.032  
26 22 30. Conn SM, Butterfield LD. Coping with secondary traumatic stress by general duty police  
27 23 officers: Practical implications. *CJC-RCC* 2013;**47**(2):272-98.  
28 24 31. Levy-Gigi E, Richter-Levin G, Keri S. The hidden price of repeated traumatic exposure:  
29 25 different cognitive deficits in different first-responders. *Front Behav Neurosci*  
30 26 2014;**8**:281. doi: 10.3389/fnbeh.2014.00281  
31 27 32. Skeffington PM, Rees CS, Mazzucchelli T. Trauma exposure and post-traumatic stress  
32 28 disorder within fire and emergency services in Western Australia. *Aust J Psychol*  
33 29 2017;**69**(1):20-28. doi: 10.1111/ajpy.12120  
34 30 33. Swedish Civil Contingencies Agency. Gender equality in numbers 2017.  
35 31 (<https://www.msb.se/sv/Insats--beredskap/Jamstallldhet--mangfald/Jamstallldhet-i-siffror/>) Accessed 010419.  
36  
37  
38  
39  
40  
41  
42  
43  
44  
45  
46  
47  
48  
49  
50  
51  
52  
53  
54  
55  
56  
57  
58  
59  
60

Figure 1. Time sequences, Categories and Sub-categories



## COREQ (COnsolidated criteria for REporting Qualitative research) Checklist

A checklist of items that should be included in reports of qualitative research. You must report the page number in your manuscript where you consider each of the items listed in this checklist. If you have not included this information, either revise your manuscript accordingly before submitting or note N/A.

| Topic                                          | Item No. | Guide Questions/Description                                                                                                                              | Reported on Page No. |
|------------------------------------------------|----------|----------------------------------------------------------------------------------------------------------------------------------------------------------|----------------------|
| <b>Domain 1: Research team and reflexivity</b> |          |                                                                                                                                                          |                      |
| <i>Personal characteristics</i>                |          |                                                                                                                                                          |                      |
| Interviewer/facilitator                        | 1        | Which author/s conducted the interview or focus group?                                                                                                   |                      |
| Credentials                                    | 2        | What were the researcher's credentials? E.g. PhD, MD                                                                                                     |                      |
| Occupation                                     | 3        | What was their occupation at the time of the study?                                                                                                      |                      |
| Gender                                         | 4        | Was the researcher male or female?                                                                                                                       |                      |
| Experience and training                        | 5        | What experience or training did the researcher have?                                                                                                     |                      |
| <i>Relationship with participants</i>          |          |                                                                                                                                                          |                      |
| Relationship established                       | 6        | Was a relationship established prior to study commencement?                                                                                              |                      |
| Participant knowledge of the interviewer       | 7        | What did the participants know about the researcher? e.g. personal goals, reasons for doing the research                                                 |                      |
| Interviewer characteristics                    | 8        | What characteristics were reported about the interviewer/facilitator? e.g. Bias, assumptions, reasons and interests in the research topic                |                      |
| <b>Domain 2: Study design</b>                  |          |                                                                                                                                                          |                      |
| <i>Theoretical framework</i>                   |          |                                                                                                                                                          |                      |
| Methodological orientation and Theory          | 9        | What methodological orientation was stated to underpin the study? e.g. grounded theory, discourse analysis, ethnography, phenomenology, content analysis |                      |
| <i>Participant selection</i>                   |          |                                                                                                                                                          |                      |
| Sampling                                       | 10       | How were participants selected? e.g. purposive, convenience, consecutive, snowball                                                                       |                      |
| Method of approach                             | 11       | How were participants approached? e.g. face-to-face, telephone, mail, email                                                                              |                      |
| Sample size                                    | 12       | How many participants were in the study?                                                                                                                 |                      |
| Non-participation                              | 13       | How many people refused to participate or dropped out? Reasons?                                                                                          |                      |
| <i>Setting</i>                                 |          |                                                                                                                                                          |                      |
| Setting of data collection                     | 14       | Where was the data collected? e.g. home, clinic, workplace                                                                                               |                      |
| Presence of non-participants                   | 15       | Was anyone else present besides the participants and researchers?                                                                                        |                      |
| Description of sample                          | 16       | What are the important characteristics of the sample? e.g. demographic data, date                                                                        |                      |
| <i>Data collection</i>                         |          |                                                                                                                                                          |                      |
| Interview guide                                | 17       | Were questions, prompts, guides provided by the authors? Was it pilot tested?                                                                            |                      |
| Repeat interviews                              | 18       | Were repeat interviews carried out? If yes, how many?                                                                                                    |                      |
| Audio/visual recording                         | 19       | Did the research use audio or visual recording to collect the data?                                                                                      |                      |
| Field notes                                    | 20       | Were field notes made during and/or after the interview or focus group?                                                                                  |                      |
| Duration                                       | 21       | What was the duration of the interviews or focus group?                                                                                                  |                      |
| Data saturation                                | 22       | Was data saturation discussed?                                                                                                                           |                      |
| Transcripts returned                           | 23       | Were transcripts returned to participants for comment and/or                                                                                             |                      |

| Topic                                  | Item No. | Guide Questions/Description                                                                                                        | Reported on Page No. |
|----------------------------------------|----------|------------------------------------------------------------------------------------------------------------------------------------|----------------------|
|                                        |          | correction?                                                                                                                        |                      |
| <b>Domain 3: analysis and findings</b> |          |                                                                                                                                    |                      |
| <i>Data analysis</i>                   |          |                                                                                                                                    |                      |
| Number of data coders                  | 24       | How many data coders coded the data?                                                                                               |                      |
| Description of the coding tree         | 25       | Did authors provide a description of the coding tree?                                                                              |                      |
| Derivation of themes                   | 26       | Were themes identified in advance or derived from the data?                                                                        |                      |
| Software                               | 27       | What software, if applicable, was used to manage the data?                                                                         |                      |
| Participant checking                   | 28       | Did participants provide feedback on the findings?                                                                                 |                      |
| <i>Reporting</i>                       |          |                                                                                                                                    |                      |
| Quotations presented                   | 29       | Were participant quotations presented to illustrate the themes/findings?<br>Was each quotation identified? e.g. participant number |                      |
| Data and findings consistent           | 30       | Was there consistency between the data presented and the findings?                                                                 |                      |
| Clarity of major themes                | 31       | Were major themes clearly presented in the findings?                                                                               |                      |
| Clarity of minor themes                | 32       | Is there a description of diverse cases or discussion of minor themes?                                                             |                      |

Developed from: Tong A, Sainsbury P, Craig J. Consolidated criteria for reporting qualitative research (COREQ): a 32-item checklist for interviews and focus groups. *International Journal for Quality in Health Care*. 2007. Volume 19, Number 6: pp. 349 – 357

**Once you have completed this checklist, please save a copy and upload it as part of your submission. DO NOT include this checklist as part of the main manuscript document. It must be uploaded as a separate file.**
